# Supplementary material for: Chromosomal clustering of a human transcriptome reveals regulatory background
Source: PubMed Central journal article supplement (PMC1261156; doi:10.1186/1471-2105-6-230), 2005-09-19
Supplement: 1471-2105-6-230-S1.pdf [file 1471-2105-6-230-S1.pdf]

Table 1S – Transcription factors shared by gene clusters

| Cluster Nr | HUGO Name | Ensembl-ID                         | Strand  | TSS Distance | Transcription Factor                                                                                                                                                                                                                                                                                               |
|------------|-----------|------------------------------------|---------|--------------|--------------------------------------------------------------------------------------------------------------------------------------------------------------------------------------------------------------------------------------------------------------------------------------------------------------------|
| 1          |           | ENSG00000127481                    | -       |              | CDPCR3HD,TBP                                                                                                                                                                                                                                                                                                       |
| 1          |           | ENSG00000127463                    | -       | 41304        | AHRARNT, AML1, AP1, ARNT, COREBF, COUP, CP2, E12, ELF1, ETF, FOXO3, GKL, LFA1, MYB, MYOD, RORA1, SMAD4, SRY, STAT5A, STAT5B, STAT6, TEF1                                                                                                                                                                           |
| 2          | C1orf33   | ENSG00000127463<br>ENSG00000053372 | -       | 253          | AHRARNT, AML1, AP1, ARNT, COREBF, COUP, CP2, E12, ELF1, ETF, FOXO3, GKL, LFA1, MYB, MYOD, RORA1, SMAD4, SRY, STAT5A, STAT5B, STAT6, TEF1, HLF, USF                                                                                                                                                                 |
| 3          |           | ENSG00000142687                    | -       |              | MZF1, YY1, AP1, AP2ALPHA, AREB6, CEBP, CP2, EN1, FOXO4, GATA3, HAND1E47, LYF1, MEIS1, MSX1, NKX25, OCT1, PAX4, RREB1, SF1, TCF4, TGIF, TST1, VDR                                                                                                                                                                   |
| 4          | EIF2C4    | ENSG00000020129<br>ENSG00000134698 | +       | 416          | MZF1, YY1, AP2, AP2GAMMA, AP2REP, ATF, CACBP, GATA1, NFY, OSF2, PU1, SRY, STAT3<br>AP2ALPHA, FREAC2, LFA1, PAX4, PITX2, STAT3<br>AML1, AREB6, CREB1, ELF1, ETF, EVI1, FOXD3, FOXM1, FOXO1, HFB3, LEF1, LMO2COM, MYOGENIN, NFKAPPAB, NKX25, P53, PAX2, PEAS3, PU1, SRY, STAT5A, STAT5B                              |
| 4          | EIF2C1    | ENSG00000092847                    | +       | 61586        | T5B, STAT6<br>AREB6, ETF, PU1, AML1, CREB1, ELF1, EVI1, FOXD3, FOXM1, FOXO1, HFB3, LEF1, LMO2COM, MYOGENIN, NFKAPPAB, NKX25, P53, PAX2, PEAS3, PU1, SRY, STAT5A, STAT5B                                                                                                                                            |
| 5          | EIF2C1    | ENSG00000092847                    | +       |              |                                                                                                                                                                                                                                                                                                                    |
| 5          | EIF2C3    | ENSG00000126070                    | +       | 60910        | AREB6, ETF, PU1, CETS1P54<br>AP2, AP2GAMMA, AP4, AR, ATF1, BACH1, CDP, CDX2, CRX, E47, FOXM1, GATA4, HAND1E47, HEB, HNF6, HSF1, HSF2, IK3, ISRE, MAX, MEIS1, MMEF2, MYC, MYC, NFE2, NFKAPPAB, SOX5, NFKX62, NMYC, OCT1, OSF2, P300, PEAS3, PITX2, PU1, RREB1, SMAD4, SOX5, SP1, SRY, STAT4, TCF11, TGIF, USF2, YY1 |
| 6          | THRAP3    | ENSG00000116871<br>ENSG00000054118 | +       | 68476        | AREB6, P53, STAT1<br>AML1, AP2GAMMA, AP2REP, ATF4, CACBP, HLF, IK1, LBP1, LMO2COM, NFKAPPAB65, NFY, SP1, TCF11, TCF1P, TFIIB, ZIC2, ZIC3                                                                                                                                                                           |
| 7          |           | ENSG00000089598                    | -       |              |                                                                                                                                                                                                                                                                                                                    |
| 7          |           | ENSG000001171357                   | +       | 16971        | AP2ALPHA, CEBP, FOXD3, GATA1, LYF1, STAT4<br>AP2REP, AP3, AR, CEBP, FOXJ2, LBP1, PAX4, POU1F1, SF1, STAT5B, TEF1, ZIC2                                                                                                                                                                                             |
| 8          |           | ENSG00000134748                    | -       |              |                                                                                                                                                                                                                                                                                                                    |
| 8          |           | ENSG00000134744                    | -       | 148536       | DBP, HMGYI, MEIS1, NFAT, NKX62, SRY<br>CEBPDDELTA, IRF1, STAT5A, STAT6, TCF11, TCF4, AML1, AP1, AP2ALPHA, AREB6, CDC5, CEBP, CEBP, CETS1P54, HNF4ALPHA, HNF6, LBP1, PAX4, S8, SMAD3, VDR, YY1                                                                                                                      |
| 9          |           | ENSG00000158966                    | +       |              |                                                                                                                                                                                                                                                                                                                    |
| 9          |           | ENSG00000162437                    | +       | 162936       | CEBPDDELTA, IRF1, STAT5A, STAT6, TCF11, TCF4, AP4, CACBP, CEBPGAMMA, FOXJ2, FOXM1, FREAC3, HFB3, HNF3ALPHA, HSF2, LHX3, MAZ, MZF1, NKX3A, NKX61, OCT1, P53, PAX2, PBX1, RREB1, SF1, SRY, TATA, TEF, TEF1                                                                                                           |
| 10         | BCL10     | ENSG00000142867                    | -       |              | AP2REP, FOXM1, GATA1, HOXA4, OCT1, PAX4, SOX5, STAT6, AP4, FOXD3, GATA4, IRF1, LFA1, MEIS1, NFY, PEAS3, HMGYI, USF2, TCF1P, TCF1P                                                                                                                                                                                  |
| 10         | DDAH1     | ENSG00000153904                    | -       | 187145       | AP2REP, FOXM1, GATA1, HOXA4, OCT1, PAX4, SOX5, STAT6, AREB6, CDX2, CETS1P54, E12, E2F1, FOXO4, HFB3, HMGYI, MAZ, MYOD, NKX25, PAX8, PBX1, POU1F1, POU3F2, RPS8, S8, STAT1, STAT4, TITF1, USF2, ZIC2                                                                                                                |
| 11         |           | ENSG00000162641                    | +       |              | AP2REP, CEBP, CDC5, P53, PITX2, PU1                                                                                                                                                                                                                                                                                |
| 11         | GPSM1     | ENSG00000121957                    | +       |              | AP2REP, CEBP, AP3, ARP1, CEBPGAMMA, FAC1, HLF, HMGYI, LYF1, SMAD3, STAT5A                                                                                                                                                                                                                                          |
| 12         |           | ENSG00000023902                    | +       |              | CREL, CRX, DBP, HFB3, HOXA3, LFA1, MYB                                                                                                                                                                                                                                                                             |
| 12         | ANP32E    | ENSG00000143401                    | -       | 86336        | AP2ALPHA, ATF1, BRN2, CEBPDDELTA, ERR1, GKL, HSF2, IPF1, MZF1, NFAT, NFE2, NFY, PAX2, SOX5, TEF1                                                                                                                                                                                                                   |
| 13         | BNIP1     | ENSG00000163141                    | +       |              | AP4, DBP, HAND1E47, LYF1, MAZ, RPS8, SRY, TCF1P, YY1                                                                                                                                                                                                                                                               |
| 13         |           | ENSG00000175498                    | unknown |              | AP1, CEBP, HEB                                                                                                                                                                                                                                                                                                     |
| 14         |           | ENSG00000175498                    | unknown |              | AP1, CEBP, HEB                                                                                                                                                                                                                                                                                                     |
| 14         |           | ENSG00000143415                    | +       |              | AP2REP, AP4, GKL, MAZ, NKX25, PAX4, PU1, SRY, STAT3, TEF, TFIIB                                                                                                                                                                                                                                                    |
| 15         | TUFT1     | ENSG00000143367                    | +       | 107458       | HNF4ALPHA, TATA, CACCCBF, ETF, MYOGENIN, OSF2, SF1<br>HNF4ALPHA, TATA, COUP, DBP, FOXM1, IK2, LYF1, OCT1, STAT6, TBP                                                                                                                                                                                               |
| 15         | SNX27     | ENSG00000143376                    | +       | 57112        | AML1, AP1, CDPCR3HD, CEBP, CRX, EVI1, HOXA4, P53, RORA2, TCF1P, TST1, USF2, ZIC3, AP2ALPHA, AREB6, BACH1, BACH2, CDC5, COREBF, E2F1, GATA1, GKL, F, HNF4ALPHA, HSF1, IK2, MYOD, NCX, OCT1, PAX4, PU1, SOX5, STAT, TFIIB                                                                                            |
| 16         | PEA15     | ENSG00000162734                    | +       | 107458       | AML1, AP1, CDPCR3HD, CEBP, CRX, EVI1, HOXA4, P53, RORA2, TCF1P, TST1, USF2, ZIC3, CEBP, GATA3, GATA6, HLF, HMEF2, LFA1, NFAT, NFY, NKX25, NKX62, PBX1, STAT1, STAT5A, TBP, TEF                                                                                                                                     |
| 16         | WDR42A    | ENSG00000132716                    | -       |              | AML1, AP1, CDPCR3HD, CEBP, CRX, EVI1, GATA3, GATA6, HLF, HMEF2, HOXA4, LFA1, NFAT, NFY, NKX25, NKX62, P53, PBX1, RORA2, STAT1, STAT5A, TBP, TEF, TCF1P, TST1, USF2, ZIC3                                                                                                                                           |
| 17         | WDR42A    | ENSG00000132716                    | -       |              |                                                                                                                                                                                                                                                                                                                    |
| 17         | PEX19     | ENSG00000162735                    | -       | 22686        | SRY                                                                                                                                                                                                                                                                                                                |
| 18         |           | ENSG00000117477                    | -       |              |                                                                                                                                                                                                                                                                                                                    |
| 18         | SLC19A2   | ENSG00000117479                    | -       | 58529        | PEA3, SRY, TAL1ALPHA47, TCF4<br>PEA3, AML1, AP1, AP4, CETS1P54, COREBF, CREB1, CREL, DBP, ETF, FOXO4, GATA1, GATA3, GATA4, MMEF2, MSX1, MYB, MYOD, NKX22, P53, PITX2, RORA1, SMA D3, SP1, STAT5A, STAT5B, TBP, TFIIB                                                                                               |
| 19         |           | ENSG00000135835                    | +       |              | AP2REP, TEF1, AP3, CACBP, HMGYI, HNF1, ICSP, NFAT, PU1, STAT6, ZF5                                                                                                                                                                                                                                                 |
| 19         | STX6      | ENSG00000135823                    | +       | 92273        | AP2REP, TEF1, AREB6, BACH2, CACCCBF, CDX2, CEBP, EN1, HNF3ALPHA, LEF1, MMEF2, MYOD, NKX25, TFIIB, YY1                                                                                                                                                                                                              |
| 20         |           | ENSG00000120334                    | -       |              | DBP, PBX1, TCF4                                                                                                                                                                                                                                                                                                    |
| 20         |           | ENSG00000117593                    | +       | 150          | CEBPD, E2F1, E2F1DP1, ETF, GATA1, HEB, IRF1, LYF1, NFAT, NKX22, PU1, YY1, ZF5                                                                                                                                                                                                                                      |
| 21         | PROX1     | ENSG00000117707                    | +       |              | E2F1DP1, HLF, NKX25, OCT1, PEA3, SRY, TBP, USF                                                                                                                                                                                                                                                                     |
| 21         | SMYD2     | ENSG00000143499                    | +       | 284696       | AP3, AREB6, CEBPGAMMA, EN1, ERR1, FOXM1, MYOGENIN, PAX2, PU1, SOX5, STAT1, STAT4, STAT5A, YY1                                                                                                                                                                                                                      |
| 22         | ACTN3     | ENSG00000077522                    | +       |              | AP4, LYF1, AML1, AREB6, CDP, CEBP, CEBPGAMMA, CREB1CIUM, ELF1, FAC1, FOXD3, FOXJ2, IK3, MYB, NKX25, NKX61, OCT1, POU1F1, SMAD3, STAT5B, TBP, TEF, ZIC3                                                                                                                                                             |
| 22         | MTR       | ENSG00000116984                    | +       | 108919       | AP4, LYF1, E2F1, LBP1, MEIS1, ZF5                                                                                                                                                                                                                                                                                  |
| 23         | HNRPJ     | ENSG00000153187                    | +       |              | LYF1, MAZ, STAT5A, STAT5B, AHRARNT, AP2GAMMA, E2F1DP1R8, FOXD3, HNF3ALPHA, NFE2, NKX3A, P53, PAX4, TCF1P                                                                                                                                                                                                           |
| 23         |           | ENSG00000153188                    | +       | 105460       | LYF1, MAZ, STAT5A, STAT5B, AML1, AP1, AP2ALPHA, AP4, AREB6, ARP1, BRN2, CACBP, CEBPDDELTA, CREB1CIUM, ELF1, ETF, EVI1, FOXO4, GATA4, GCM, HMGYI, HNF6, IRF1, LHX3, MEIS1, MRF2, MSX1, MYB, NFAT, NKX62, OCT1, PBX1, POU1F1, RPS8, STAT1, TEF, TEF1, TFIIB, USF, ZID                                                |
| 24         | HADHA     | ENSG00000084754                    | +       |              | PITX2, TCF4, AP1, HOXA4, MYOGENIN, SOX5                                                                                                                                                                                                                                                                            |
| 24         | HADHB     | ENSG00000138029                    | +       | 295          | PITX2, TCF4, CEBPDDELTA, FREAC4, IRF1, MZF1, SRY, STAT5A, STAT6, TITF1                                                                                                                                                                                                                                             |
| 25         | SPG4      | ENSG00000021574                    | +       |              | SRY, FOXD3, FOXM1, OCT1, OSF2, PAX2, RORA1, TCF1P, USF2, ZF5, ZIC3                                                                                                                                                                                                                                                 |
| 25         | SLC30A6   | ENSG00000152683                    | +       | 102247       | SRY, AP2REP, DBP, HMGYI, HOXA3, NKX3A, POU6F1                                                                                                                                                                                                                                                                      |
| 26         | XPO1      | ENSG00000082898                    | -       |              | LYF1, AR, CDP, CEBP, E12, FAC1, HOXA4, HSF2, IRF1, MYB, MYOD, PAX8, PITX2, SMAD3, SRY, TITF1                                                                                                                                                                                                                       |
| 26         |           | ENSG00000110264                    | -       | 315848       | LYF1, AML1, AP1, AP2ALPHA, AP2REP, HLF, MAZ, NKX25, NKX61, PAX2, RORA1, RORA2, STAT5B, TATA, TEF, TFIIB                                                                                                                                                                                                            |
| 27         | UGP2      | ENSG00000169764                    | +       |              |                                                                                                                                                                                                                                                                                                                    |
| 27         | VPS54     | ENSG00000143952                    | +       | 142935       | AP1F3, AP2GAMMA, AP2REP, AP4, AREB6, CACBP, CEBPA, DBP, E2F, FOXD3, GATA3, IK2, LBP1, LYF1, MMEF2, MYB, MYC, MZF1, NFAT, NFY, S8, STAT, TEF1                                                                                                                                                                       |
| 28         | MAD       | ENSG00000059728                    | +       |              | HMGYI, HOXA4, NKX25, TCF4, YY1                                                                                                                                                                                                                                                                                     |
| 28         |           | ENSG00000179818                    | -       | 47080        | GKL, P53, PU1, TBP, AP2ALPHA, ATF3, HOXA4, LFA1, MZF1, NFY, PAX2, PEAS3, TCF11                                                                                                                                                                                                                                     |
| 29         |           | ENSG00000135956                    | -       |              | GKL, P53, PU1, TBP, AML1, AP1, P57, ATF4, CETS1P54, DBP, ELF1, EN1, ETF, FOXO4, HFB3, HMGYI, HNF1, LEF1, OCT1, OSF2, RREB1, SF1, SP1, SRY, STAT5A, STAT5B, TCF4, VDR                                                                                                                                               |
| 29         |           | ENSG00000144021                    | +       | 197          | AP2REP, ATF4, DBP, ELK1, GATA3, HEB, IK3, TCF1P, CEBPA, CREL, E2F, ERR1, MYOGENIN, P300, STAT6, ZIC3                                                                                                                                                                                                               |
| 30         |           | ENSG00000144021                    | +       |              | AP2REP, ATF4, DBP, ELK1, GATA3, HEB, IK3, TCF1P, CEBPA, CREL, E2F, ERR1, MYOGENIN, P300, STAT6, ZIC3                                                                                                                                                                                                               |
| 30         |           | ENSG00000144028                    | +       | 39355        | AP2REP, AREB6, SRY, EVI1, MSX1, PU1, ZF5                                                                                                                                                                                                                                                                           |
| 31         | PTPN4     | ENSG00000088179                    | +       |              | AP1, AP3, CEBP, DBP, EVI1, IRF1, NKX22, NKX25, STAT6, TEF1                                                                                                                                                                                                                                                         |
| 31         | EPB41L5   | ENSG00000115109                    | +       | 253446       | AP2REP, ATF4, DBP, ELK1, GATA3, HEB, IK3, TCF1P, AP2ALPHA, AP4, AREB6, CEBP, COUP, EN1, GATA4, LFA1, MAZ, MZF1, PAX4, PEAS3, SP21, SRY, STAT5A, STAT5B, TAXACREB, TCF4, TITF1, USF2, ZIC1                                                                                                                          |
| 32         | EPB41L5   | ENSG00000115109                    | +       |              | CACBP, LMO2COM, TCF4, CDX2, E47, LYF1, MZF1                                                                                                                                                                                                                                                                        |
| 32         | FAM11B    | ENSG00000179724                    | +       | 210331       | CACBP, LMO2COM, TCF4, AP1F3, CEBPGAMMA, DBP, IK2, LFA1, MYOD, NFE2, OSF2, PAX4, PEAS3, PU1, SRY, STAT6, TFIIB, TITF1, USF                                                                                                                                                                                          |
| 33         | FAM11B    | ENSG00000179724                    | +       |              | AP1F3, STAT6, CACBP, CEBPGAMMA, DBP, IK2, LFA1, LMO2COM, MYOD, NFE2, OSF2, PAX4, PEAS3, PU1, SRY, TCF4, TFIIB, TITF1, USF                                                                                                                                                                                          |
| 33         | RALB      | ENSG00000144118                    | +       | 29445        | AP1F3, STAT6, AP4, CETS1P54, EVI1, GATA1, HMGYI, MZF1, NFAT, P300, STAT5A, TBP, USF2, ZIC2                                                                                                                                                                                                                         |
| 34         | PREI3     | ENSG00000115540                    | +       |              | STAT5A, GATA3, PITX2, PU1, STAT1, STAT3, TFIIB                                                                                                                                                                                                                                                                     |
| 34         | C2orf11   | ENSG00000162944                    | -       | 159817       | STAT5A, ATF6, ERR1, GATA1, LBP1, NCX, NKX25, OCT1, SMAD4<br>AP3, EVI1, FOXM1, MSX1, TBP, TCF1P, AP1, AR, DBP, ERR1, FOXD3, HAND1E47, HSF1, IRF1, MMEF2, MYOD, NKX3A, NKX62, PITX2, POU3F2, PU1, SRY, STAT4, STAT5B, TCF4, ZIC2                                                                                     |
| 35         | RAPH1     | ENSG00000173166                    | -       |              | AP3, EVI1, FOXM1, MSX1, TBP, TCF1P, AML1, AP2GAMMA, GATA1, GATA4, GKL, HLF, LFA1, MEIS1, NFY, OCT1, PAX2, POU6F1, SMAD3, SREBP1, STAT6, TATA, TFIIB                                                                                                                                                                |
| 35         | CD28      | ENSG00000178562                    | -       | 171150       | A, ZID<br>AP3, EVI1, GATA1, LFA1, MEIS1, OCT1, STAT6, TFIIB, AML1, AP2GAMMA, FOXM1, GATA4, GKL, HLF, MSX1, NFY, PAX2, POU6F1, SMAD3, SREBP1, TATA, TBP, TCF1P, ZID                                                                                                                                                 |
| 36         | CD28      | ENSG00000178562                    | +       |              |                                                                                                                                                                                                                                                                                                                    |
| 36         | CTL4      | ENSG00000163599                    | +       | 161286       | AP3, EVI1, GATA1, LFA1, MEIS1, OCT1, STAT6, TFIIB, AP1, AP2ALPHA, AP4, CEBP, COREBF, CRX, E2F1, ELF1, ERR1, FAC1, HNF3ALPHA, HOXA4, HSF2, IPF1, LEF1, LMO2COM, MEIS1, BHOXA9, MMEF2, MYOGENIN, MZF1, NKX25, NKX61, P53, PBX1, PEA3, RORA2, SMAD4, SP1, SRY, STAT5A, TEF1, TGIF, USF                                |
| 37         | CREB1     | ENSG00000118260                    | +       | 95369        | AREB6, ATF1, CEBPGAMMA, CREL, FOXM1, GATA4, HNF4ALPHA, HNF6, IRF1, LBP1, MEIS1, POU1F1, RREB1, STAT, TBP, TEF1, TST1, ZIC2                                                                                                                                                                                         |
| 37         |           | ENSG00000144401                    | +       |              | AP2REP, CRX                                                                                                                                                                                                                                                                                                        |
| 38         | FBLN2     | ENSG00000163520                    | +       |              | AP2REP, AP4, ETF, GATA1, IK2, MYC, MZF1, NFAT, OSF2, POU1F1, PU1, SF1, STAT3, STAT4, TCF4, ZIC2                                                                                                                                                                                                                    |
| 38         | WN7A      | ENSG00000154764                    | +       | 309809       | AP2REP, CREB, LMO2COM, MAZ, NKX25, OCT1, TCF11, ZF5<br>EN1, MZF1, CACBP, CEBP, CETS1P54, COREBF, CREB, CRX, GATA2, HEB, HMGYI, LBP1, MEIS1, MYOGENIN, NFE2, NFKB, SMAD4, SOX5, TAL1BETA47, TBP, TITF1, ZIC3                                                                                                        |
| 39         | GALNTL2   | ENSG00000131386                    | +       |              | EN1, MZF1, AP2ALPHA, AP2REP, ERR1, FAC1, GATA4, STAT5A, TCF4                                                                                                                                                                                                                                                       |
| 39         | ZCSL2     | ENSG00000154813                    | +       | 90293        | STAT5A, SRY, TEF1                                                                                                                                                                                                                                                                                                  |
| 40         | TGM4      | ENSG00000163810                    | +       |              | STAT5A, AML1, AP2REP, AREB6, CETS1P54, CHOP, DBP, E2F1, FOXO1, FOXO4, GATA1, GATA4, HFB4, HMGYI, HOXA3, HOXA4, IK2, IRF1, LFA1, LHX3, NKX25, PAX4, PAX8, POU1F1, SMAD3, SMAD4, STAT3, STAT6, TST1, USF, USF2                                                                                                       |
| 40         | ZDHHC3    | ENSG00000163812                    | -       | 101511       | AP1, CREB, ELF1, ETF, GATA3, GCM, HMGYI, LBP1, LFA1, LYF1, NFKB, PU1, TFIIB                                                                                                                                                                                                                                        |
| 41         | KIF9      | ENSG00000088727                    | +       |              | STAT5A                                                                                                                                                                                                                                                                                                             |
| 41         | KLHL18    | ENSG00000114648                    | +       | 273          | IPF1, FOXO4, LBP1, LFA1, MEIS1                                                                                                                                                                                                                                                                                     |
| 42         | SEMA3B    | ENSG000000012171                   | +       |              | IPF1, AML1, AP1, AP2GAMMA, AREB6, CDC5, CDP, CEBP, CEBPA, CHOP, COREBF, COUP, CRX, DBP, EFC, ELF1, ERR1, EVI1, HSF1, LHX3, LMO2COM, PITX2, SMAD3, SMAD4, STAT, STAT5A, TCF1P, ZIC3                                                                                                                                 |
| 42         | GNAI2     | ENSG00000114353                    | +       | 18191        | HMGYI, AP2GAMMA, AP3, COREBF, DBP, EN1, FAC1, GATA1, HOXA3, ICSP, LEF1, MAZ, MYC, NFY, NKX3A, OCT1, PEA3, STAT6, TCF4, TGIF, TST1, USF2                                                                                                                                                                            |
| 43         | PXK       | ENSG00000168297                    | +       |              | HMGYI, AREB6, CACBP, MYB, SRY                                                                                                                                                                                                                                                                                      |
| 43         | PDHB      | ENSG00000168291                    | +       | 100937       | CEBP, E2F1, LBP1, MZF1, AP2REP, ETF, HOXA4, LMO2COM, MAZ, NFAT, PU1, SP1, STAT5A                                                                                                                                                                                                                                   |
| 44         | PVL3      | ENSG00000177707                    | +       |              | CEBP, E2F1, LBP1, MZF1, AP1, AREB6, ATF, CDX2, CEBPGAMMA, CREL, E12, EN1, GATA2, HFB3, LHX3, LYF1, MYB, OCT1, PAX2, POU1F1, TBP, TCF1P, TCF4, TEF1, TFIIB, USF2, VDR                                                                                                                                               |
| 44         | CD96      | ENSG00000153283                    | +       | 470448       | AP2GAMMA, AP3, AP4, AREB6, CDP, CEBP, CEBP, CEBPGAMMA, CREB1, DBP, E12, FOXM1, GATA1, GATA6, HNF1, ICSP, IK2, LEF1, LYF1, MAZ, MEIS1, MYC, MYC, MYOD, MYOGENIN, NFAT, OCT1, PAX2, PAX4, PEAS3, SP3, SRY, STAT, STAT6, TBP, TEF1, TGIF, USF2, YY1                                                                   |
| 45         | PHLDB2    | ENSG00000144824                    | +       |              | AP2REP, GATA4, HSF2, NFKAPPAB, SF1, STAT4                                                                                                                                                                                                                                                                          |
| 45         |           | ENSG00000144827                    | -       | 119277       | DBP, STAT4, STAT6, AP2REP, ELF1, EN1, LFA1, LYF1, NFAT, STAT5A                                                                                                                                                                                                                                                     |
| 46         |           | ENSG00000138496                    | -       |              | DBP, STAT4, STAT6, AP2ALPHA, CRX, GATA3, HMGYI, IRF1, PEAS3, SRY, STAT5B, TCF4                                                                                                                                                                                                                                     |
| 46         |           | ENSG00000163840                    | +       | 171          | AP1, AP2ALPHA, AREB6, ETF, FOXJ2, GATA1, GATA3, HEB, HMGYI, HOXA4, LHX3, MEF2, MEIS1, MYOD, NFY, OSF2, PAX4, PEAS3, POU6F1, SRF, STAT5A, TEF1, TITF1, USF2, ZID                                                                                                                                                    |
| 47         | PARP14    | ENSG00000173193                    | +       |              | CACBP, E2F1, HSF2, SREBP1, SRY                                                                                                                                                                                                                                                                                     |
| 47         | HSPBP1    | ENSG00000169087                    | +       | 94227        |                                                                                                                                                                                                                                                                                                                    |
| 48         | PPP2R3A   | ENSG00000073711                    | +       |              | SF1, SRY, AP4, AREB6, CACBP, CDPCR3HD, CEBPGAMMA, FOXM1, GATA1, HMGYI, IRF1, LFA1, MEIS1, MSX1, MYC, NFE2, SP21, STAT, STAT6, TITF1, SF1, SRY, AP1, AP2ALPHA, AR, CDX2, CEBP, E2F, E2F1, FAC1, FOXO4, HFB3, HFB4, HOXA3, IK2, LBP1, NKX22, NKX3A, P53, PAX8, PEAS3, POU1F1, STAT5A, STAT5B, TCF4, ZIC1, ZID        |
| 48         |           | ENSG00000174579                    | -       | 230142       | HOXA4, NFAT, NKX25, NKX61, CEBPGAMMA, EN1, GKL, HFB3, HNF1, IK2, MMEF2, MRF2, PAX2, PAX4, POU1F1, STAT1, STAT5A, ZIC1                                                                                                                                                                                              |
| 49         | DBR1      | ENSG00000138231                    | -       |              |                                                                                                                                                                                                                                                                                                                    |

|     |                 |         |        |                                                                                                                                                                 |
|-----|-----------------|---------|--------|-----------------------------------------------------------------------------------------------------------------------------------------------------------------|
| 49  | ENSG00000114908 | +       | 12644  | HOX4, NFAT, NKX25, NKX61, AREB6, CACBP, DBP, EV11, FOXO4, GATA3, GATA6, HFH4, HLF, HOXA3, LFA1, LYF1, MYOGENIN, OCT1, OSF2, P53, PEAK3, PITX2, STA              |
| 50  | ARMC8           | -       |        | STAT5A, AP1, AP2REP, AP3, AR, AREB6, ATF3, CEBPDDELTA, FOXD3, GATA4, HFH3, HLF, HSF1, MMEF2, MYB, OCT1, PAX4, SP1, STAT6, TCF4, ZIC3                            |
| 50  | DHX36           | -       | 203081 | STAT5A, AP1, AP2REP, AP3, AR, AREB6, ATF3, CEBPDDELTA, FOXD3, GATA4, HFH3, HLF, HSF1, MMEF2, MYB, OCT1, PAX4, SP1, STAT6, TCF4, ZIC3                            |
| 51  | SMC4L1          | +       | 441    | MYB                                                                                                                                                             |
| 52  | DVL3            | +       |        | CETS1P54, AP3, CP2, MZF1, STAT3                                                                                                                                 |
| 52  | AP2M1           | +       | 19467  | CETS1P54, AP2REP, AREB6, ATF1, ATF4, FOXM1, FOXO1, HNF4ALPHA, LFA1, LYF1, MAZ, MYOGENIN, NKX62, P53, RORA2, SMAD3, TFIIA, ZIC2                                  |
| 53  | C4orf9          | +       |        | AR, HEB, RSRFC4                                                                                                                                                 |
| 53  | GRK4            | +       | 246    | E2F1, FOXO1, NFAT, STAT5B, ZF5                                                                                                                                  |
| 54  | GRK4            | +       |        | E2F1, FOXO1, NFAT, STAT5B, ZF5                                                                                                                                  |
| 54  | HD              | +       | 110888 | SF1, STAT6                                                                                                                                                      |
| 55  | ZCHC4           | +       |        | E2F1, HOXA4, IRF1, TCF4, USF                                                                                                                                    |
| 55  | ANAPC4          | +       | 64632  | AP1, CEBPGAMMA, CREBP1CIUN, DBP, FOXM1, HNF3ALPHA, HNF6, IPF1, MYOD, NKX25, OCT1, PU1, SF1, SRY, STAT5A, STAT6, TEF1, USF2                                      |
| 56  | EPH45           | unknown |        | CACBP, CDX2, GATA3                                                                                                                                              |
| 56  | EPH45           | -       |        | CACBP, AP1, AP2, AP2GAMMA, AP3, AP4, AREB6, BACH2, CDPCR3HD, CEBPA, CEBPDDELTA, CHX10, DBP, E2F1, ERR1, FOXD3, FOXM1, FOXO4, FREAL3, GATA6, GK                  |
| 57  | PRKAA1          | -       |        | LF, HAND1E47, HEB, HMGY1, HNF1, IRF1, LFA1, MAZ, MYB, MZF1, NKX62, OCT1, PAX8, RP58, SF1, SP1, SP3, TST1, USF, USF2                                             |
| 57  | RPL37           | -       | 37028  | AP2GAMMA, ELF1, IRF1, MAZ, PAX2, SF1, SP1, SRY, STAT6, TITF1                                                                                                    |
| 58  | RPL37           | -       |        | CEBPGAMMA, MYOD, STAT5B                                                                                                                                         |
| 58  | CARD6           | +       | 5976   | LFA1, P53, USF2                                                                                                                                                 |
| 59  | CARD6           | +       |        | LFA1, P53, USF2                                                                                                                                                 |
| 59  | C7              | +       | 68227  | CEBP, DBP, GATA6, GKL, HEB, LYF1, MYOD, NFAT, SF1, SP1, TEF1                                                                                                    |
| 60  | MSH3            | +       |        | SF1, STAT6, AML1, AP3, TEF1, TITF1                                                                                                                              |
| 60  | RASGRF2         | +       | 305768 | SF1, STAT6, AP2GAMMA, AP4, AREB6, CDC5, CHOP, ELF1, EN1, HMGY1, IRF1, LYF1, MAZ, MYOGENIN, NFAT, NKX25, NKX3A, NMYC, OCT1, PAX2, PEAK3, STAT, TATA              |
| 61  | RASGRF2         | +       |        | TBP, TCF1P, TGIF, USF                                                                                                                                           |
| 61  | RASGRF2         | +       |        | AREB6, EN1, PAX2, PEAK3, AP2GAMMA, AP4, CDC5, CHOP, ELF1, HMGY1, IRF1, LYF1, MAZ, MYOGENIN, NFAT, NKX25, NKX3A, NMYC, OCT1, SF1, STAT, STAT6, TATA              |
| 61  | CKMT2           | +       | 272632 | TBP, TCF1P, TGIF, USF                                                                                                                                           |
| 62  | CAST            | +       |        | AREB6, EN1, PAX2, PEAK3, CDPCR1, CDPCR3, FOXJ2, FOXO1, HNF3ALPHA, MTF1, P53, PAX4, PAX1, STAT4, STAT5A, TCF11                                                   |
| 62  | CAST            | +       | 132401 | HMGY1, LYF1, AREB6, HNF4ALPHA, HOXA4, ICSBP, LFA1, OSF2, P53, PU1, STAT6, TCF1P, TEL2, ZIC2                                                                     |
| 63  | ENSG00000164403 | -       |        | SMAD4, AP1, AP2REP, AP4, CACBP, CDPCR1, CP2, E2F, FAC1, HEB, HOXA3, ICSBP, LFA1, NKX25, SOX5, SRY, STAT1, TFII1, ZIC1, ZIC3                                     |
| 63  | GDF9            | -       | 33636  | SMAD4, AP1, GATA2, IRF1, LYF1, MYOGENIN, SF1, STAT4, ZIC2                                                                                                       |
| 64  | GDF9            | -       |        | IRF1, AP1, GATA2, LYF1, MYOGENIN, SF1, SMAD4, STAT4, ZIC2                                                                                                       |
| 64  | GDF9            | +       | 2136   | IRF1, AP2ALPHA, GATA4, HFH4, LEF1, OSF2, TCF1P                                                                                                                  |
| 65  | SARA2           | -       |        | AREB6, DBP, GKL, SF1, SRY, TBP, AP1, AP3, CACBP, CEBPA, COUP, CREB, FOXD3, FOXM1, HLF, HMGY1, HOXA4, LFA1, LMO2COM, SP3, TEF1, USF2                             |
| 65  | SEC24A          | +       | 15983  | AREB6, DBP, GKL, SF1, SRY, TBP, AP2GAMMA, ARNT, ATF6, CEBPB, CP2, E2F, GATA6, MYOD, NCX, NFKAPPAB65, PAX4, PAX1, RORA1, SF1, SMAD3, SOX5, TGIF, TITF1, USF, ZID |
| 66  | SEC24A          | +       |        | USF, ZID                                                                                                                                                        |
| 66  | CAMLG           | +       | 89694  | AP2GAMMA, AREB6, ARNT, ATF6, CEBPB, CP2, DBP, E2F, GATA6, GKL, MYOD, NCX, NFKAPPAB65, PAX4, PAX1, RORA1, SF1, SMAD3, SOX5, SRY, TBP, TGIF, TITF1, USF, ZID      |
| 67  | NDUFA2          | -       |        | AP3, LBP1                                                                                                                                                       |
| 67  | IK              | -       | 140    | AML1, AP2REP, ZIC1, AP1, AP2GAMMA, AP3, CEBPB, E2F1, E47, E4F1, ERR1, FOXM1, GATA2, LMO2COM, MYOGENIN, NFY, OCT1, POU6F1, SMAD3, SRY, TBP, TFII1                |
| 68  | IK              | +       |        | AML1, AP2REP, ZIC1, E2F, MZF1, SPZ1, STAT5B, ZIC1                                                                                                               |
| 68  | ENSG00000120314 | +       | 17054  | AP1F3, AREB6, LBP1, PITX2, POU1F1, TCF4, TFII1                                                                                                                  |
| 69  | DIAPH1          | -       |        | AP2REP, LYF1, PAX2, TEF1                                                                                                                                        |
| 69  | HDAC3           | -       | 17931  | AML1, AP1, AP2, AP4, AREB6, ATF, ATF3, CP2, E47, GATA1, HSF2, MYCAX, NFMUE1, PAX4, SP1, SREBP1, STAT3, STAT5A, STAT5B, TAL1ALPHA4E7, TCF11, TCF4, T             |
| 69  | SYNPO           | +       |        | AMP1, AP2, AP4, AREB6, ATF, ATF3, CP2, E47, GATA1, HSF2, MYCAX, NFMUE1, PAX4, SP1, SREBP1, STAT3, STAT5A, STAT5B, TAL1ALPHA4E7, TCF11, TCF4, T                  |
| 70  | MYOZ3           | +       | 60257  | ITF1, USF, VDR, ZIC1, ZIC3                                                                                                                                      |
| 71  | HMMR            | +       |        | AML1, FOXO4, GATA3, SP1, AP2ALPHA, AP4, ATF3, E2F, GCM, HMGY1, MAZ, MYB, MYOD, MZF1, PAX2, SB, SF1, SMAD3, SMAD4, SPZ1, TATA, TST1                              |
| 71  | MAT2B           | +       | 42602  | AML1, FOXO4, GATA3, SP1, BACH2, CETS1P54, E12, E2F, FREAL2, HEB, LYF1, NMYC, PAX4, PAX8, PITX2, SRF, STAT5B, ZID                                                |
| 72  | EEF1E1          | unknown |        | TCF4, AML1, AP1, AR, AREB6, BNR2, CEBP, CETS1P54, EN1, FAC1, FOXD3, FXR, MYOD, NFY, OCT1, PITX2, POU1F1, STAT6, TBP, TFIIA, ZIC1                                |
| 73  | EEF1E1          | -       |        | TCF4, AP2REP, MRF2, MSX1, NKX25, PAX2, PAX8, SMAD3, SRY                                                                                                         |
| 73  | SLC35B3         | -       | 332844 | DBP, GATA6, TBP, AREB6, CACBP, CEBPGAMMA, CHX10, EN1, FAC1, FOXD3, GKL, MRF2, MZF1, NKX25, NKX61, SMAD3, SRY, STAT4, GATA5, TCF4                                |
| 74  | KIF13A          | -       |        | DBP, GATA6, TBP, APF1, E12, FREAL2, GATA4, MSX1, NKX62, P53, PEAK3, SP1                                                                                         |
| 74  | TPMT            | -       | 167592 | TBP, AP1, DBP, E12, FREAL2, GATA4, GATA6, MSX1, NKX62, P53, PEAK3, SP1                                                                                          |
| 75  | KIAA1117        | +       |        | TBP, EN1, HAND1E47, IK1, MYB, MZF1, NFE2, OCT1, POU6F1, STAT5B, TCF4, TEF1, YY1                                                                                 |
| 75  | PGM3            | +       | 70388  | STAT6, AP2REP, AP4, CEBPGAMMA, CETS1P54, E2F, FOXM1, GATA6, IRF1, OCT1, SF1, TITF1, VDR, YY1, ZIC2                                                              |
| 76  | UBE2J1          | -       |        | STAT6, DBP, POU1F1                                                                                                                                              |
| 76  | RRAGD           | -       | 59211  | AML1, LEF1, AP1, AP3, BACH2, CREBP1, ERR1, EV11, FOXD3, FOXJ2, FOXO1, GATA3, GATA4, GCM, HAND1E47, HMGY1, LMO2COM, MRF2, MYOD, NFAT, NKX3A, OC                  |
| 77  | RRAGD           | -       | 154762 | T1, P300, P53, POU1F1, PU1, RP58, SF1, SPZ1, STAT, STAT5A, STAT5B, STAT6, TBP, TCF11, TEF1, ZIC1                                                                |
| 77  | ANKRD6          | -       |        | AML1, LEF1, EN1, E2F                                                                                                                                            |
| 78  | RTN4IP1         | -       |        | ATF6, E2F, HFH3, NFY, NKX25, SP1, TCF4                                                                                                                          |
| 78  | QRSL1           | +       | 285    | COREBF, DBP, ELF1, IRF1, PITX2, SRY, STAT5B, TFII1                                                                                                              |
| 79  | PLN             | +       | 267364 | SRY, E12, LFA1, NKX25, TITF1                                                                                                                                    |
| 79  | C6orf61         | -       |        | HNF6, HOXA4, LYF1, OCT1, SOX5, SRY, STAT5B, TEF1, AREB6, FOXM1, GATA4, HLF, MEIS1, PEAK3, SF1, STAT3, USF                                                       |
| 80  | SYNJ2           | +       |        | HNF6, HOXA4, LYF1, OCT1, SOX5, SRY, STAT5B, TEF1, CRX, E2F, HMGY1, PAX1, STAT4, TBP                                                                             |
| 80  | SERAC1          | +       | 186387 | AP3, NFAT, STAT5A, AP4, EV11, MZF1, NKX3A, PEAK3, SRY, TBP, TCF4, TEF, TEF1, TGIF                                                                               |
| 81  | OGDH            | +       | 149597 | AP3, NFAT, STAT5A, AP2REP, CEBPB, CEBPGAMMA, E2F1, FOXJ2, FOXM1, FOXO4, HOXA4, IRF1, LFA1, MYOD, MYOGENIN, NFE2, NKX25, NRF1, P53, STAT1, TITF1, USF2           |
| 82  | FKBP6           | +       | 194252 | USF2                                                                                                                                                            |
| 83  | BAZ1B           | +       | 201243 | FOXO1                                                                                                                                                           |
| 84  | PEX1            | -       |        | AP2GAMMA, AP3, HSF1, IPF1, MYB, TBP                                                                                                                             |
| 84  | BET1            | +       | 306    | DBP, LFA1, MAZ, SRY, TEF1, AML1, AR, CEBP, CEBPGAMMA, CRX, FOXM1, HFH3, MSX1, PITX2, SMAD3, STAT5A, TATA, TEF, TITF1                                            |
| 85  | COL1A2          | +       | 390671 | DBP, LFA1, MAZ, SRY, TEF1, CP2, CREB, CREL, E2F1, ELF1, GATA1, GATA2, HIF1, LBP1, LEF1, MYCAX, PAX4, PAX8, SF1, SP1, SPZ1, USF, ZID                             |
| 86  | ARHGFE10        | unknown |        | E4BP4, TFIIA, CP2, LEF1, SF1                                                                                                                                    |
| 87  | LYSAL1          | +       |        | E4BP4, TFIIA, DBP, E12, HOXA4, LFA1, MYB, NCX, NFKB, NFY, PAX4, SP1, TCF4                                                                                       |
| 87  | LYSAL1          | +       | 71304  | DBP, PU1, TBP, TEF1, AML1, AP2REP, CEBPB, FOXO1, GATA3, GATA4, HNF6, IRF1, LYF1, MYOGENIN, NFAT, NKX25, P300, STAT4, ZF5                                        |
| 88  | SGKL            | +       | 37590  | DBP, PU1, TBP, TEF1, CEBPDDELTA, FOXO4, HFH3, HIF1, NKX3A, OCT1, TCF1P, USF2                                                                                    |
| 89  | SGKL            | +       | 83668  | EV11, AML1, AP2REP, AREB6, CEBP, CEBPB, EN1, FOXO3, IPF1, MMEF2, NKX22, P300, PU1, SRY, TEF1, TST1                                                              |
| 90  | RPL7            | -       | 169907 | EV11, AP4, ATF3, BACH2, COREBF, GATA2, HEB, HFH3, HLF, HNF3ALPHA, HOXA3, IK1, LBP1, LMO2COM, LYF1, NKX25, OCT1, P53, PAX4, TATA, TBP, TCF11, TCF1P, TEF         |
| 91  | IMPA1           | -       |        | FOXO1, HMGY1, OCT1, PITX2, CDC5, MEIS1, NKX3A, P300, TST1                                                                                                       |
| 91  | IMPA1           | -       | 34967  | FOXO1, HMGY1, OCT1, PITX2, AML1, AP1, AP2GAMMA, AREB6, DBP, FREAL2, GATA1, HNF3ALPHA, HOXA4, MAZ, MRF2, NCX, NKX25, NKX61, POU6F1, PU1, S8, SF                  |
| 92  | ENSG00000104231 | -       |        | 1, SPZ1, STAT3, TCF1P, TEF, TEF1                                                                                                                                |
| 92  | ENSG00000104231 | -       |        | AP2ALPHA, AP2REP, HLF, IRF1, LFA1, MEIS1, PAX2, PU1, SP1, SRY, STAT3                                                                                            |
| 93  | EIF3S3          | +       | 11154  | DBP, EN1, GCM, RREB1, STAT5A                                                                                                                                    |
| 93  | EIF3S3          | +       |        | LFA1, AP1, AREB6, BACH2, CEBPDDELTA, EN1, FOXD3, FOXM1, GATA3, HOXA3, HSF2, PAX2, PEAK3, PITX2, POU1F1, TCF4, VDR, ZF5, ZIC3                                    |
| 94  | ENSG00000147679 | +       | 10701  | LFA1, AP1, AP4, EV11, MYB, MYOD, OCT1, PU1, SOX5, STAT5B, YY1                                                                                                   |
| 94  | ENSG00000147679 | +       |        | CDPCR3HD, DBP, LFA1, OCT1, YY1, AP2GAMMA, CETS1P54, CREL, CRX, HLF, MSX1, MZF1, NFY, OSF2, POU6F1, TCF11, TEF1                                                  |
| 95  | RAD21           | -       | 108249 | AREB6, DBP, FOXO1, HOXA3, NFAT, SOX5, SRY, STAT, STAT1, TFII1, TITF1                                                                                            |
| 95  | KIAA0020        | -       |        | APF1, CDPCR3HD, COREBF, E2F, GATA2, GATA3, HMEF2, IK1, MEIS1, NKX62, SF1, STAT6, TBP, TCF4, ZIC2                                                                |
| 96  | RFK3            | -       | 681888 | MAZ, ZF5, AML1, AP1, CDX2, CP2, CRX, EN1, FOXD3, FOXO1, GATA3, HSF1, MRF2, OCT1, PAX4, PEAK3, RORA1, SF1, STAT5A, STAT6, TCF4, TEF1, TITF1                      |
| 96  | SPTAN1          | +       |        | MAZ, ZF5, AP2ALPHA, ATF1, CEBPB, FOXM1, GCM, MZF1, SMAD3, SMAD4, TGIF, ZIC3                                                                                     |
| 97  | WDR34           | -       | 104184 | AP2REP, STAT5A, AP3, NFY                                                                                                                                        |
| 97  | SVIL            | -       | 473536 | AP2REP, STAT5A, AP3, NFY                                                                                                                                        |
| 98  | H2AFY2          | +       |        | AP2REP, STAT5A, AP3, NFY                                                                                                                                        |
| 98  | AMID            | -       | 80089  | AP2REP, STAT5A, AP3, NFY                                                                                                                                        |
| 99  | SARA1           | -       | 62921  | AP2REP, STAT5A, AP3, NFY                                                                                                                                        |
| 99  | SARA1           | -       |        | AP2REP, STAT5A, AP3, NFY                                                                                                                                        |
| 100 | PSAP            | -       |        | AP2REP, STAT5A, AP3, NFY                                                                                                                                        |
| 100 | CHST3           | +       | 113092 | AP2REP, STAT5A, AP3, NFY                                                                                                                                        |
| 101 | ACTA2           | +       |        | AP2REP, STAT5A, AP3, NFY                                                                                                                                        |
| 101 | TNFRSF6         | +       | 37770  | AP2REP, STAT5A, AP3, NFY                                                                                                                                        |
| 102 | TLL2            | -       |        | AP2REP, STAT5A, AP3, NFY                                                                                                                                        |
| 102 | TLL2            | -       |        | AP2REP, STAT5A, AP3, NFY                                                                                                                                        |
| 102 | TLL2            | -       | 73134  | AP2REP, SF1, STAT5A, AR, AREB6, CDC5, DBP, E12, E4F1, E2F, HNF3ALPHA, HOXA3, IPF1, LYF1, MSX1, NKX22, NKX25, PAX4, PEAK3, PU1, SMAD3, STAT4, TITF1              |
| 103 | ANKRD2          | +       |        | AP1, AP2GAMMA, CACBP, PU1, STAT4                                                                                                                                |

|     |           |                  |         |        |                                                                                                                                                                                                                                                                                                                                                             |
|-----|-----------|------------------|---------|--------|-------------------------------------------------------------------------------------------------------------------------------------------------------------------------------------------------------------------------------------------------------------------------------------------------------------------------------------------------------------|
| 103 | C10orf65  | ENSG00000155252  | +       | 11829  | API, ALPHACP1, AP2ALPHA, ARP1, CDP, ELK1, EV11, FOXM1, GATA3, GATA4, IRF1, LBP1, LFA1, LMO2COM, LYF1, MYB, MZF1, NFKAPPAB50, NFY, OCT1, PITX2, POU1F1, RORA1, SPI, TFIII, USF2, ZIC2                                                                                                                                                                        |
| 104 | MGEA5     | ENSG00000107832  | -       |        | SF1, SRY                                                                                                                                                                                                                                                                                                                                                    |
| 104 | KCNIP2    | ENSG00000120049  | -       | 25498  | AP1, AP2, AREB6, CACBP, EV11, GATA1, HEB, HMGIY, IK3, NKX22, NKX25, SMAD4, TGIF                                                                                                                                                                                                                                                                             |
| 105 | TALD01    | ENSG00000177225  | -       |        | MZF1, SMAD4, TEL2, ZIC3                                                                                                                                                                                                                                                                                                                                     |
| 105 | TALD01    | ENSG00000177156  | +       | 2207   | LFA1, MYOD, TCF4                                                                                                                                                                                                                                                                                                                                            |
| 106 | LMO1      | ENSG00000166407  | -       |        | AP1, ISRE, LBP1, MEIS1, OCT1, AML1, AP2, AP4, AREB6, CDP, CEBPB, COREBF, GATA2, HEB, HNF4ALPHA, IK1, MYOD, MZF1, NFKAPPAB, NFKB, NKX3A, NKX62, RP5, 8, SMAD4, SOX5, SP1, SP2, SRY, STAT1, TCF1P, TCF2, USF, YY1, ZIC2                                                                                                                                       |
| 106 | SYT13     | ENSG00000130413  | -       | 316490 | AP1, ISRE, LBP1, MEIS1, OCT1, AP2GAMMA, AP2REP, CDC5, CEBPB, GAMMA, ELF1, EN1, FREAC7, HOXA3, HOXA4, LYF1, NFY, P53, POU3F2, RSRFC4, SMAD3, SP3, STAT6, TCF4, TEF, TGIF, TITF1                                                                                                                                                                              |
| 107 | API5      | ENSG000001166181 | +       |        | AT1, HNF1, LBP1, ZF5                                                                                                                                                                                                                                                                                                                                        |
| 107 | TTC17     | ENSG00000052841  | +       | 46938  | AP1, AREB6, ATF4, BACH2, CP2, E2F1, ELF1, EN1, EV11, FOXD3, GATA1, GKLF, HSF1, IK2, IRF1, LEF1, MSX1, NFAT, PAX4, POU6F1, SRY, STAT4, TAL1, BETAE47, TITF1, USF2                                                                                                                                                                                            |
| 108 | TP5311    | ENSG00000175274  | -       |        | AREB6, EN1, SF1, ZIC2, ALPHACP1, AP1, AP2ALPHA, CDP, CEBPA, CEBPB, COUP, GATA1, HAND1E47, HEB, HOXA4, MAZ, MYOGENIN, NFAT, PBX1, PEAS3, SPI, SRY, STAT6, TCF1P, TCF4, TFIII, VDR                                                                                                                                                                            |
| 108 | SYT13     | ENSG00000109505  | -       | 169576 | AREB6, EN1, SF1, ZIC2, BRN2, CACBP, CDPCR3HD, DBP, ELF1, GATA4, HOXA3, LBP1, MEIS1, MEIS1AHOXA9, MSX1, MYB, MZF1, NKX25, PAX2, PITX2, POU1F1, POU1F2, STAT5A, STAT5B, TEF1, ZIC3                                                                                                                                                                            |
| 109 | PANX1     | ENSG00000110218  | +       |        | AREB6, AML1, AP2REP, AP4, CEBPB, LYF1, NKX3A, POU1F1, POU1, TGIF                                                                                                                                                                                                                                                                                            |
| 109 | GPR83     | ENSG00000123901  | -       | 272322 | AREB6, DBP, GATA1, LMO2COM, MAZ, MEIS1BHOXA9, NFY, NKX25, NKX62, PAX2, PBX1, STAT5A, STAT6, TFIII                                                                                                                                                                                                                                                           |
| 110 | ROBO4     | ENSG00000154133  | -       |        | HMGIY, HOXA4, POU1, AP2, BACH2, DBP, ETF, FOXO1, LMO2COM, MYOGENIN, NFKAPPAB, POU1F1, STAT, STAT3, STAT6, TCF4                                                                                                                                                                                                                                              |
| 110 |           | ENSG00000165478  | -       | 38205  | HMGIY, HOXA4, POU1, AP1, AP2REP, CEBPB, CP2, E2F1, ELF1, FOXM1, GKLF, HNF4, LYF1, MAZ, MZF1, NFAT, NKX25, NKX62, P53, PEAS3, STAT5A, TITF1, ZIC1, ZID                                                                                                                                                                                                       |
| 111 | SCNN1A    | ENSG00000111319  | -       |        | AP2, AR, GATA3, HOXA4, OCT1, POU1, RREB1, SPI, AP3, AP4, CDX2, DBP, E2F1DP1, EFC, EV11, FOXM1, HNF3ALPHA, HOXA3, LBP1, MYOGENIN, MZF1, P300, P53, PEAS3, TCF4, TEF1, TEL2, TFIII, TGIF, ZIC1, ZIC2                                                                                                                                                          |
| 111 | LTRB      | ENSG00000111321  | +       | 8607   | AP2, AR, GATA3, HOXA4, OCT1, POU1, RREB1, SPI, AREB6, CETS1P54, CP2, E2F1DP2, ETF, HAND1E47, HEB, LFA1, LHX3, PAX2, SMAD3, SP21, SRY, STAT3, STAT5A, STAT5B, STAT6, USF2                                                                                                                                                                                    |
| 112 |           | ENSG00000165685  | +       |        | STAT5B, AP1F1, AP3, CDC5, CDPCR3HD, CP2, EFC, ERR1, FOXD3, FOXM1, GATA1, GATA6, GKLF, MAZ, NKX3A, P300, PAX2, PBX1, SF1, SRY, STAT4, STAT5A                                                                                                                                                                                                                 |
| 112 | GABARAPL1 | ENSG00000139112  | +       | 33798  | STAT5B, AP2REP, BACH2, CEBPGAMMA, LYF1, NKX25, PAX4, STAT6, AML1, AP2GAMMA, AP3, AP4, AREB6, CEBPB, CETS1P54, COREBF, CP2, DBP, FOXM1, HNF3ALPHA, HNF4ALPHA, LBP1, MTF1, OCT1, P53, SOX5, STAT5A, STAT5B, ZIC1                                                                                                                                              |
| 113 | FGD4      | ENSG00000139132  | +       |        | IC1                                                                                                                                                                                                                                                                                                                                                         |
| 113 | DNM1L     | ENSG00000108740  | +       | 177125 | CDP, TGIF                                                                                                                                                                                                                                                                                                                                                   |
| 113 | DNM1L     | ENSG00000108740  | +       |        | CDP, TGIF                                                                                                                                                                                                                                                                                                                                                   |
| 114 |           | ENSG00000139131  | -       | 76615  | HMGIY, HOXA4, MEIS1, POU1F1, SP1, TCF4, TEF                                                                                                                                                                                                                                                                                                                 |
| 115 | SYT13     | ENSG00000139131  | -       |        | TCF4, HMGIY, HOXA4, MEIS1, POU1F1, SP1, TEF                                                                                                                                                                                                                                                                                                                 |
| 115 | PKP2      | ENSG00000057294  | -       | 140856 | TCF4, AP1, AP1, AP3, AREB6, CACBP, GATA4, HEB, HSF2, NKX62, P53, PEAS3, PU1, TBP                                                                                                                                                                                                                                                                            |
| 116 | TUBA1     | ENSG00000123416  | -       |        | ELF1, HEB, USF, ZIC2                                                                                                                                                                                                                                                                                                                                        |
| 116 |           | ENSG00000139636  | -       | 30643  | AP2REP, CREB1CJUN, GATA3, HMGIY, MYB, NKX22, SRY                                                                                                                                                                                                                                                                                                            |
| 117 | SLC11A2   | ENSG00000110911  | -       |        | AREB6, NKX62, PITX2, TEF1, TGIF, CEBPB, CEBPDelta, AML1, HSF2, IPF1, LYF1, MAZR, NFE2, PAX2, PU1, YY1                                                                                                                                                                                                                                                       |
| 117 | C12orf22  | ENSG00000110925  | -       | 31076  | AREB6, NKX62, PITX2, TEF1, TGIF, AP1, AML1, AP2ALPHA, AP3, AP4, AR, CDX2, CEBPA, CEBPGAMMA, CETS1P54, CP2, EFC, FAC1, FOXD3, FOXM1, FOXO4, GATA3, GCM, HAND1E47, HMGIY, HOXA4, IC5BP, LFA1, MMEF2, NFKAPPAB50, NKX22, NKX25, NKX3A, OCT1, PAX4, POU1F1, STAT, STAT5A, STAT5B, TFIII                                                                         |
| 118 | MMP19     | ENSG00000123342  | -       |        | LFA1, TCF11, TFIII, ZIC3                                                                                                                                                                                                                                                                                                                                    |
| 119 | TMEM4     | ENSG00000144785  | -       |        | AML1, AP2ALPHA, AP2REP, AP3, AP4, AREB6, CACBP, EN1, LYF1, MEIS1, MRF2, MSX1, NFKB, SF1, SMAD4, SPI                                                                                                                                                                                                                                                         |
| 119 | CS        | ENSG00000062485  | -       | 38732  | AP2REP, LFA1, AP2, AREB6, E2F1, HSF2, IC5BP, IK1, MAZR, MSX1, NCX, OSF2, TCF4, ZF5                                                                                                                                                                                                                                                                          |
| 120 | SLC39A5   | ENSG00000139540  | +       |        | AP2REP, LFA1, CDPCR3HD, CEBPB, DBP, E2F, GATA1, GATA4, IRF1, MZF1, OCT1, PAX2, PAX4, PEAS3, PITX2, SF1, SPI, SRY, STAT5B, TEF1, YY1, ZIC2                                                                                                                                                                                                                   |
| 120 |           | ENSG00000139579  | +       | 7992   | STAT3, AP1, AP4, ATF3, ATF6, ETF, FOXO1, HOXA3, MYB, MZF1, NFAT, PEAS3, PITX2, SF1, SP1, USF                                                                                                                                                                                                                                                                |
| 121 | TBC1D15   | ENSG00000121749  | +       |        | STAT3, CP2, ERR1                                                                                                                                                                                                                                                                                                                                            |
| 121 | TPH2      | ENSG00000139287  | +       | 99218  | NKX25, SF1, AP1, IC5BP, RORA1, STAT5A, TBP, NKX25, SF1, AREB6, CDX2, CEBPB, CEBPGAMMA, CP2, ELF1, ERR1, FOXD3, FOXM1, FOXO4, GATA1, GATA6, HAND1E47, HMGIY, LYF1, NFAT, OCT1, PAX4, PBX1, TEF, TITF1                                                                                                                                                        |
| 122 |           | ENSG00000175504  | unknown |        | E2F1, MYOGENIN, PAX2, SPI, STAT6, AML1, AP1, AP2ALPHA, AREB6, CEBPDelta, DBP, FOXD3, FOXO4, GATA1, GATA6, HMGIY, HOXA4, LFA1, MSX1, NFAT, NKX25, PU1, SRY, STAT5A, TFIII                                                                                                                                                                                    |
| 122 | NUDT4     | ENSG00000173598  | +       |        | E2F1, MYOGENIN, PAX2, SPI, STAT6, AP2, E47, EN1, GATA3, LYF1                                                                                                                                                                                                                                                                                                |
| 123 |           | ENSG00000136003  | unknown |        | ATF3                                                                                                                                                                                                                                                                                                                                                        |
| 123 |           | ENSG00000176123  | unknown |        | AP2GAMMA, AP2REP, DBP, ETF, GATA3, LFA1, LMO2COM, LYF1, MYOGENIN, POU1F1, SF1, SP1, STAT3                                                                                                                                                                                                                                                                   |
| 124 | FBXW8     | ENSG00000174989  | +       |        | NKX25, STAT5A, TCF1P, USF2, ZIC1                                                                                                                                                                                                                                                                                                                            |
| 124 |           | ENSG00000088992  | -       | 188501 | AP2ALPHA, CDC5, EN1, GATA2, MZF1, P53                                                                                                                                                                                                                                                                                                                       |
| 125 | KCTD4     | ENSG00000180332  | -       |        | CDPCR3HD, EV11, FOXD3, FOXM1, GATA1, NKX25, POU6F1, SOX5, STAT4, TCF4, TEF1                                                                                                                                                                                                                                                                                 |
| 125 | TPT1      | ENSG00000133112  | -       | 146445 | AP2REP, ATF6, SP1, USF2                                                                                                                                                                                                                                                                                                                                     |
| 126 | ITGBL1    | ENSG00000139783  | +       |        | NKX62, PAX2, POU1F1, HOXA3, STAT5B, APF1, AP1, AP3, EN1, HAND1E47, HOXA3, IK3, IPF1, LYF1, MZF1, PBX1, PU1, TBP, TCF1P                                                                                                                                                                                                                                      |
| 126 | FGF14     | ENSG00000102466  | -       | 464036 | NKX62, PAX2, POU1F1, SMAD3, STAT5B, AML1, AP4, AR, CETS1P54, CHOP, CREB1CJUN, CRX, E2F1, E47, EV11, GATA1, HSF2, IC5BP, IK1, LBP1, LFA1, MSX1, NFE2, NFY, NKX22, NKX25, OCT1, P53, STAT6, TCF11, TCF4, TFIII                                                                                                                                                |
| 127 | CFL2      | ENSG00000165410  | -       |        | LYF1, MAZ, PITX2                                                                                                                                                                                                                                                                                                                                            |
| 127 | BAZ1A     | ENSG00000092277  | -       | 160929 | AP1, AP2REP, AREB6, CEBPDelta, CREB1CJUN, ELK1, EV11, FOXM1, GATA6, HNF3ALPHA, ISRE, LEF1, LHX3, MEIS1, MRF2, NFE2, NFY, NKX22, NKX25, NKX3A, OCT1, PBX1, SRY, TBP                                                                                                                                                                                          |
| 128 | KIAA1596  | ENSG00000092191  | +       |        | OCT1, PBX1, SRY, TBP                                                                                                                                                                                                                                                                                                                                        |
| 128 | C14orf106 | ENSG00000129534  | -       | 110991 | OCT1, AREB6, CDPCR3HD, DBP, EN1, FOXD3, IRF1, NKX3A, PAX4, TGIF                                                                                                                                                                                                                                                                                             |
| 129 |           | ENSG00000170348  | -       |        | AML1, AP2REP, EN1, LYF1, AP1F1, BRN2, CACBP, CDC5, CDPCR3HD, CEBPGAMMA, COUP, ETF, FOXM1, FREAC3, HNF4, HNF4ALPHA, P53, PAX2, SF1, SRY, STAT, TA, TCF4, TFIII                                                                                                                                                                                               |
| 129 | FOS       | ENSG00000170345  | +       | 102193 | AML1, AP2REP, EN1, LYF1, AP1, AP4, AREB6, ATF1, ELF1, EV11, FOXO1, FOXO4, GATA1, HNF3, HNF3ALPHA, IRF1, LBP1, LFA1, LMO2COM, MAZ, MRF2, MYB, MZF1, NFKAPPAB50, NFMUE1, PEAS3, POU1F1, RORA1, RREB1, SB, SMAD4, SOX5, SP3, STAT1, STAT3, STAT4, STAT5, TBP, TCF11, TGIF, TST1, YY1, ZIC2                                                                     |
| 130 | C14orf4   | ENSG00000119669  | -       |        | AP4, AREB6, ATF3, FOXM1, GATA3, HNF3ALPHA, IRF1, SRF, STAT3, AHRARNT, AML1, AP2, CACBP, CEBPA, CETS1P54, COUP, CREB1, E2F1, E47, EN1, FOXO4, GATA1, GATA6, GCM, HNF6, HOXA4, HSF1, HSF2, LBP1, LEF1, LYF1, MTF1, MZF1, NFKAPPAB50, NFMUE1, NKX62, NR1, OCT1, OSF2, P300, PAX2, PAX4, PBX1, PEAS3, PITX2, POU1F1, POU6F1, PU1, SP1, SP21, TCF1P, TITF1, ZIC3 |
| 130 | KIAA1737  | ENSG00000133965  | +       | 70526  | AP4, AREB6, ATF3, FOXM1, GATA3, HNF3ALPHA, IRF1, SRF, STAT3, ARNT, ATF1, CEBPB, E2F1DP1, FOXJ2, GATA2, HIF1, HMGIY, HNF4ALPHA, LHX3, LMO2COM, MRF2, MYB, NKX22, NKX61, STAT5A, STAT5B, TBP, TEF1, ZIC1                                                                                                                                                      |
| 131 | AK7       | ENSG00000140057  | +       |        | STAT5A                                                                                                                                                                                                                                                                                                                                                      |
| 131 | PAPOLA    | ENSG00000090060  | +       | 110349 | APF1, AP3, CEBPB, CHOP, EN1, HOXA4, HSF1, LHX3, LYF1, MYB, PU1, SF1, SRY                                                                                                                                                                                                                                                                                    |
| 132 | ZFP106    | ENSG00000103994  | +       |        | GATA1, CEBPB, E47, EN1, EV11, FAC1, GATA6, HMGIY, HNF3ALPHA, IK1, IRF1, MEIS1, NKX25, NKX61, OCT1, PBX1, PU1, SF1, SOX5, SP1, TCF1P, TST1, ZID                                                                                                                                                                                                              |
| 132 | SNAP23    | ENSG00000092531  | -       | 38070  | GATA1, CEBPGAMMA, FOXD3, IK2, TCF11                                                                                                                                                                                                                                                                                                                         |
| 133 | SNAP23    | ENSG00000092531  | +       |        | CEBPGAMMA, FOXD3, GATA1, IK2, TCF11                                                                                                                                                                                                                                                                                                                         |
| 133 |           | ENSG00000180979  | -       | 53165  | AP1, AP2, AP2GAMMA, AP2REP, AP3, CDC5, CDP, CEBP, CEBPDelta, ETF, FAC1, FOXM1, GCM, IRF1, MAZ, NKX61, OCT1, P53, PAX4, PBX1, POU1F1, STAT, TEF1, TITF1, ZIC2, ZID                                                                                                                                                                                           |
| 134 | MPI       | ENSG00000178802  | +       |        | STAT6, CETS1P54, EN1, STAT1, ZF5                                                                                                                                                                                                                                                                                                                            |
| 134 | C15orf17  | ENSG00000178761  | +       | 15979  | STAT6, AML1, AP1, MYB, SRY, TEF1                                                                                                                                                                                                                                                                                                                            |
| 135 | NDUFB10   | ENSG00000140990  | +       |        | FOXO1, GATA1, GATA6, LBP1, MEIS1BHOXA9, TBP                                                                                                                                                                                                                                                                                                                 |
| 135 | RP52      | ENSG00000140988  | -       | 5300   | AP2REP, CP2, GCM, SRY                                                                                                                                                                                                                                                                                                                                       |
| 136 | TFAP4     | ENSG00000090447  | +       |        | AP4, STAT6, AP2GAMMA, AREB6, ATF1, CEBP, CEBPA, CETS1P54, CREB, DBP, E2F1DP2, EN1, FAC1, FOXO4, GKLF, IK1, LYF1, MYCMAJ, MYOD, OCT1, PEAS3, PITX2, POU1F1, SRY, STAT5A, TAXKREB, TCF4, TEF1                                                                                                                                                                 |
| 136 | GLIS2     | ENSG00000126603  | +       | 59250  | AP4, STAT6, AP2ALPHA, E12, FOXD3, IRF1, MMEF2, PAX2, SF1, SP21, TFIII, TGIF                                                                                                                                                                                                                                                                                 |
| 137 | GLIS2     | ENSG00000126603  | +       | 84703  | SF1, AP2ALPHA, AP4, E12, FOXD3, IRF1, MMEF2, PAX2, SP21, STAT6, TFIII, TGIF                                                                                                                                                                                                                                                                                 |
| 137 |           | ENSG00000103246  | -       |        | SF1, AP2GAMMA, AP3, CACBP, DBP, HIF1, LBP1, NRF1, P300, STAT3, STAT5B, TBP, BACH2, IK2, LYF1, MZF1, SRY, AML1, AP1F1, AP2GAMMA, AP4, AREB6, CDPCR3HD, CP2, CRX, E2F1DP1, HAND1E47, HSF2, LBP1, MYOD, OSF2, PU1, STAT4, TFIII, USF                                                                                                                           |
| 138 | HRIPI3    | ENSG00000149930  | +       | 22170  | BACH2, IK2, LYF1, MZF1, SRY, AP2, ATF6, CEBPGAMMA, HIF1, LFA1, MAZ, MAZR, MEIS1, NFMUE1, P300, PAX4, SF1, SP1, STAT5A, TCF11, ZF5, ZIC3                                                                                                                                                                                                                     |
| 139 | VPS35     | ENSG00000069329  | -       | 46     | GATA1, MYB, SOX5, STAT5A, TEF1, CEBPGAMMA, EN1, GATA2, MZF1, STAT5B, TATA                                                                                                                                                                                                                                                                                   |
| 140 | ORCGL     | ENSG00000091651  | +       |        | GATA1, MZF1, SRY, STAT5B, STAT6, AP1, AP2REP, CEBP, CHX10, FOXO1, FOXO3, HNF6, HOXA3, HOXA4, LFA1, MAZ, MYCMAJ, NCX, NKX25, P300, PAX2, PAX4, STAT4, STAT5A, TCF11, TCF4, TEF1                                                                                                                                                                              |
| 140 | ORCGL     | ENSG00000091651  | +       | 58657  | GATA1, AP3, E2F1, HOXA3, MYB, NFY, OCT1, SMAD3, SOX5, SP1, SREB1, STAT4, STAT5A, TEF1, TFIIA                                                                                                                                                                                                                                                                |
| 140 |           | ENSG00000140795  | -       |        | GATA1, GKLF, HNF4, HNF3ALPHA, MAZ, MZF1, TCF1P, TFIII, TST1                                                                                                                                                                                                                                                                                                 |
| 141 |           | ENSG00000006740  | +       |        | P300, AP2REP, CDC5, CDP, CREB, E2F, ELF1, HLF, HNF3ALPHA, LHX3, LYF1, MEIS1, MYB, NKX62, OCT1, SF1, SP3, SREB1, STAT, STAT4, TCF1P, TGIF, USF2                                                                                                                                                                                                              |
| 141 | ELAC2     | ENSG00000006744  | -       | 228482 | P300, AP4, CDX2, PAX2, POU1F1, RP58, STAT5A                                                                                                                                                                                                                                                                                                                 |
| 142 | ELAC2     | ENSG00000006744  | -       |        | PAX2, STAT5A, AREB6, ATF1, ATF3, CDP, CEBPA, CETS1P54, COREBF, CRX, DBP, ETF, FOXO1, HNF3ALPHA, HOXA3, IPF1, LMO2COM, MEIS1, MYB, MYOD, MYOGENIN, NFAT, OCT1, P53, PAX4, PBX1, POU1F1, SP3, STAT5B, TAXKREB, TEF, TITF1, VDR, ZF5, ZIC2                                                                                                                     |
| 142 | HS3T3A1   | ENSG00000153976  | -       | 583906 | HNF3ALPHA, SRY, TCF4, CDX2, FOXD3, LBP1, OSF2, STAT5A, TBP                                                                                                                                                                                                                                                                                                  |
| 143 | WSB1      | ENSG00000109046  | +       |        | HNF3ALPHA, SRY, TCF4, AML1, AP2ALPHA, AP2GAMMA, AREB6, ATF4, CDPCR3HD, DBP, FOXO1, GATA1, GATA3, GKLF, LEF1, LFA1, MAZ, MYB, MYOGENIN, MZF1, NFKAPPAB50, NFMUE1, PEAS3, POU1F1, POU1, SP1, SMAD3, SOX5, SP1, SREB1, STAT4, STAT5B, TBP, TCF1, ZF5, ZIC2                                                                                                     |
| 143 | KSR       | ENSG00000141068  | +       | 177953 | HNF3ALPHA, SRY, TCF4, AML1, AP2ALPHA, AP2GAMMA, AREB6, ATF4, CDPCR3HD, DBP, FOXO1, GATA1, GATA3, GKLF, LEF1, LFA1, MAZ, MYB, MYOGENIN, MZF1, NFKAPPAB50, NFMUE1, PEAS3, POU1F1, POU1, SP1, SMAD3, SOX5, SP1, SREB1, STAT4, STAT5B, TBP, TCF1, ZF5, ZIC2                                                                                                     |
| 144 | RPL23A    | ENSG00000173070  | +       |        | AP2ALPHA, CACBP, USF2, ELK1, GATA6, P53, PEAS3, SP1, STAT6                                                                                                                                                                                                                                                                                                  |
| 144 |           | ENSG00000160606  | -       | 6230   | AP2ALPHA, CACBP, USF2, AML1, AP1, AP1F1, AP4, AREB6, CEBPGAMMA, E2F1, ETF, HNF1, IRF1, LBP1, MEIS1, MYB, MZF1, NFKAPPAB, NFY, STAT, TCF1P, TFIII, VDR, SF                                                                                                                                                                                                   |
| 145 |           | ENSG00000108256  | -       |        | AP2, AP2REP, AREB6, CEBPB, DBP, EN1, FOXM1, HLF, LHX3, LMO2COM, LYF1, MRF2, NKX25, NKX61, NKX62, PAX4, POU3F2, SRY, STAT1, STAT5A, STAT5B, STAT6, TST1                                                                                                                                                                                                      |
| 145 |           | ENSG00000160551  | +       | 157220 | IK2, MYOGENIN, TCF11                                                                                                                                                                                                                                                                                                                                        |
| 146 |           | ENSG00000141302  | +       |        | AP3, BACH2, CDPCR3HD, CEBPB, CHOP, CREL, CRX, E2F, ERR1, FOXD3, FOXM1, FOXO1, GKLF, HAND1E47, HNF4ALPHA, IC5BP, IPF1, IRF1, LYF1, MYB, NCX, NFKAPPAB50, NKX22, NKX25, NKX61, OCT1, PEAS3, SP3, SRY, STAT1, STAT6, TBP, TFIII, VDR, ZIC1, ZIC3                                                                                                               |
| 146 |           | ENSG00000167549  | -       | 29155  |                                                                                                                                                                                                                                                                                                                                                             |
| 147 |           | ENSG00000172653  | -       |        | DBP, AP2ALPHA, AP4, CACBP, EV11, HNF4ALPHA, IK2, LFA1, OSF2, SRY, STAT5B                                                                                                                                                                                                                                                                                    |
| 147 | CCL5      | ENSG00000161570  | -       | 11486  | DBP, ARNT, GATA1, HLF, IK1, LMO2COM, NFKAPPAB50, PAX2, STAT6, TATA, TEF1                                                                                                                                                                                                                                                                                    |
| 148 | DDX52     | ENSG00000141141  | -       |        | GATA1, MZF1, SRY, STAT5B, STAT6, AP2, COUP, HLF, IRF1, OCT1, STAT3                                                                                                                                                                                                                                                                                          |
| 148 | TCF2      | ENSG00000108753  | -       | 101584 | GATA1, MZF1, SRY, STAT5B, STAT6, AP2, COUP, HLF, IRF1, OCT1, STAT3                                                                                                                                                                                                                                                                                          |
| 149 |           | ENSG00000167131  | +       |        | CACCCBF, LMO2COM, STAT5A, STAT6, CACBP, E2F1, FOXO1, MAZ, NFAT, NFKB, P300, PU1, RORA1, SF1                                                                                                                                                                                                                                                                 |
| 149 | GFAP      | ENSG00000131095  | -       | 15726  | CACCCBF, LMO2COM, STAT5A, STAT6, AP2ALPHA, AP2GAMMA, AP4, BACH1, GATA1, GKLF, HOXA3, IK2, LYF1, MEIS1, MZF1, P53, PAX2, SP3, STAT3, TFIII, ZIC1                                                                                                                                                                                                             |
| 150 | SGCA      | ENSG00000108823  | +       |        | AML1, AP2REP, AP4, AREB6, MAZR, NFAT, OCT1, OSF2, POU1F1, TCF11, TGIF, ZF5, AP1, AP2, AP2GAMMA, AP3, CEBP, CRX, ELF1, FOXD3, GATA1, GKLF, HMGIY, LFA1, LYF1, MYOGENIN, NCX, PU1, RSRFC4, SF1, SMAD3, SRY, TST1, USF2                                                                                                                                        |
| 150 | COL1A1    | ENSG00000108821  | -       | 35627  | AML1, AP2REP, AP4, AREB6, MAZR, NFAT, OCT1, OSF2, POU1F1, TCF11, TGIF, ZF5, ALPHACP1, AP1F1, ATF4, BACH2, CACBP, CEBPB, COREBF, E2F1, E2F1DP1, ERR1, GATA4, GCM, HAND1E47, IK1, IK3, IRF1, LBP1, MEIS1, NKX25, NMYC, P53, PAX4, RREB1, TAL1, BETAE47, TCF4, TFIII, TITF1                                                                                    |
| 151 |           | ENSG00000141576  | -       |        | AREB6, HNF4ALPHA, AP1, AML1, AP1, AP3, CDX2, CEBP, ETF, FOXJ2, FOXO1, FOXO4, GKLF, HMGIY, HOXA4, LYF1, MAZ, MEIS1, MZF1, NFE2, NKX61, PAX2, PEAS3, PITX2, POU6F1, SF1, STAT6, TCF1P, ZIC1                                                                                                                                                                   |

|     |         |                  |         |        |                                                                                                                                                                                                                                                                                                                         |
|-----|---------|------------------|---------|--------|-------------------------------------------------------------------------------------------------------------------------------------------------------------------------------------------------------------------------------------------------------------------------------------------------------------------------|
| 151 |         | ENSG00000129646  | -       | 67371  | AREB6, HNF4ALPHA, AP2ALPHA, ARNT, CEBPB, CP2, EN1, FAC1, GATA4, GATA6, GCM, MYCMA, OCT1, OSF2, PU1, USF2                                                                                                                                                                                                                |
| 152 | TBC1D16 | ENSG00000167291  | -       |        | CEBPDELTA, AP1, DBP, ETF, STAT5B, USF, ZIC1                                                                                                                                                                                                                                                                             |
| 152 |         | ENSG00000141519  | +       | 815    | CEBPDELTA, AML1, AP2REP, AP3, E12, E2F1, DP1RB, FAC1, HEB, HOXA3, IK2, IRF1, MAZ, MEIS1, MYB, MYOD, OSF2, PBX1, SF1, SMAD4, SRY, STAT3, TCF4                                                                                                                                                                            |
| 153 | THOC1   | ENSG00000079134  | -       |        | HNF3ALPHA, MZF1, AP2REP, AP4, CDPCR3HD, CP2, E2F1, EVI1, FOXO4, GATA1, GATA2, GATA4, HEB, HNF3ALPHA, IRF1, LEF1, LFA1, LYF1, MAZ, MYOD, MZF1, NFY, OCT1, P53, SF1, SMAD3, SP3, TITF1, USF                                                                                                                               |
| 153 | COLEC12 | ENSG00000158270  | -       | 232681 | HNF3ALPHA, MZF1, CDC5, CEBPB, ELF1, FOXM1, FOXO1, HEB, HOXA4, IRF1, LBP1, LMO2COM, LYF1, NFY, PAX4, PU1, SRY, STAT3, STAT6, ZF5, ZID                                                                                                                                                                                    |
| 154 | C18orf9 | ENSG00000101624  | -       |        | LYF1, YY1, ZIC1                                                                                                                                                                                                                                                                                                         |
| 154 | PTPN2   | ENSG00000175354  | -       | 181636 | LYF1, AML1, AP3, CEBPB, CRX, EN1, HIF1, HOXA3, LBP1, LEF1, MSX1, NFAT, NRF1, OSF2, PAX8, SP1, TFIIA                                                                                                                                                                                                                     |
| 155 | MAPRE2  | ENSG00000166974  | +       |        | POU1F1, AP2GAMMA, AREB6, CACBP, CEBPB, ELK1, EVI1, FOXO4, GATA1, GATA2, GATA4, HEB, HNF3ALPHA, IRF1, LEF1, LFA1, LYF1, MAZ, MYOD, MZF1, NFY, OCT1, P53, PAX2, PAX4, POU6F1, SMAD3, SRY, STAT, STAT1, STAT6, TAL1ALPHA47, TITF1, YY1, ZIC3                                                                               |
| 155 |         | ENSG00000118267  | +       | 199634 | POU1F1, FOXD3, TCF11                                                                                                                                                                                                                                                                                                    |
| 156 | SLC14A2 | ENSG00000132874  | +       |        | AP1, AP2REP, CACBP, CP2, FOXD3, HAND1E47, LFA1, LYF1, NFY, OCT1, STAT, STAT6, USF2, AP2ALPHA, CDX2, E2F, ERR1, EVI1, FOXO1, FREAC7, HEB, HMEF2, IK3, LHX3, MZF1, P300, PEAS3, SREBP1, SRY, TCF1P, TFII3, YY1                                                                                                            |
| 156 | SLC14A1 | ENSG00000141469  | +       | 99563  | AP1, AP2REP, CACBP, CP2, FOXD3, HAND1E47, LFA1, LYF1, NFY, OCT1, STAT, STAT6, USF2, AP3, AP4, AREB6, CEBPGAMMA, CETS1P54, CREB, CRX, DBP, HNF3ALPHA, HNF6, MTF1, MYB, MYOGENIN, NCX, NKX25, NKX62, RORA1, SF1, STAT5B, TST1, VDR                                                                                        |
| 157 | OAZ1    | ENSG00000104904  | +       |        | ELF1                                                                                                                                                                                                                                                                                                                    |
| 157 | LSM7    | ENSG00000130332  | -       | 59051  | AP2ALPHA, AP2REP, DBP, ETF, FOXM1, HAND1E47, HMGYI, PAX2, SRY, STAT5A, STAT5B, ZIC3                                                                                                                                                                                                                                     |
| 158 | SAFB2   | ENSG00000130254  | -       |        | ELF1, SP1, AP3, CEBP, DBP, E2F1, NRF1, PBX1, PU1, TCF4, YY1                                                                                                                                                                                                                                                             |
| 158 | SAFB    | ENSG00000160633  | +       | 362    | ELF1, SP1, AP1, CETS1P54, CHOP, EN1, HOXA4, LYF1, MAZ, NFMUE1, PAX3, SRY, STAT3, STAT5A, TITF1                                                                                                                                                                                                                          |
| 159 | HOOK2   | ENSG00000095066  | -       |        | AML1, AP1, DBP, E2F1, ELK1, EVI1, FOXD3, FREAC4, GATA1, GCM, HMGYI, IK1, IK3, LMO2COM, MAZR, MEIS1, MMEF2, NFKAPPAB, NFMUE1, NKX22, OCT1, PAX2, RORA1, SRF, TAL1BETA47, YY1, ZIC2, AR, COREBF, FAC1, FOXO4, GATA3, GKLF, HAND1E47, HEB, IRF1, MTF1, NKX25, NKX62, NMYC, POU1F1, SPZ1, STAT, TBP, TCF11, TCF4, TEL2, ZF5 |
| 159 | JUNB    | ENSG00000171223  | +       | 15953  | AML1, AP1, DBP, E2F1, ELK1, EVI1, FOXD3, FREAC4, GATA1, GCM, HMGYI, IK1, IK3, LMO2COM, MAZR, MEIS1, MMEF2, NFKAPPAB, NFMUE1, NKX22, OCT1, PAX2, RORA1, SRF, TAL1BETA47, YY1, ZIC2, CETS1P54, E2F1, EFC, HNF8, HNF6, IK2, PEAS3, SP1, STAT1, STAT5A, STAT5B, USF2, ZIC3                                                  |
| 160 | CHERP   | ENSG00000085872  | -       |        | GATA1, STAT5A, E2F1, LBP1, LMO2COM, MZF1, PAX4, SRY, TEL2, USF, ZIC1                                                                                                                                                                                                                                                    |
| 160 | SLC35E1 | ENSG00000127526  | -       | 29745  | GATA1, STAT5A, AML1, CETS1P54, ERR1, PEAS3, SF1, TBP                                                                                                                                                                                                                                                                    |
| 161 | UBB     | ENSG00000006717  | +       |        | ZIC1, CETS1P54, CREB, E2F4DP2, ETF, GATA1, MSX1, NRF1, PU1                                                                                                                                                                                                                                                              |
| 161 |         | ENSG00000006015  | +       | 16938  | ZIC1                                                                                                                                                                                                                                                                                                                    |
| 162 | HAMP    | ENSG00000105697  | +       |        | AP2REP, AREB6, LMO2COM, STAT                                                                                                                                                                                                                                                                                            |
| 162 | MAG     | ENSG00000105695  | +       | 9623   | ZIC1                                                                                                                                                                                                                                                                                                                    |
| 163 | GYS1    | ENSG00000104812  | -       |        | TGIF, PU1, ZIC3                                                                                                                                                                                                                                                                                                         |
| 163 | CGB2    | ENSG00000104818  | +       | 382    | TGIF, PITX2                                                                                                                                                                                                                                                                                                             |
| 164 | DPH1    | ENSG00000000419  | -       |        | AP2ALPHA, AP2REP, ATF1, ATF6, CEBPB, E2F1, ETF, LYF1, MSX1, PEAS3, STAT4, TEF1                                                                                                                                                                                                                                          |
| 164 | MOC53   | ENSG00000124217  | +       | 276    | FREAC7, HNF3ALPHA, IPF1, LEF1, LMO2COM, NCX, NFAT, NFY, OCT1, P53, PAX4, PBX1, SMAD3                                                                                                                                                                                                                                    |
| 165 | POLIP3  | ENSG00000100243  | -       |        | STAT5A                                                                                                                                                                                                                                                                                                                  |
| 165 | DIA1    | ENSG00000100243  | -       | 32121  | FOXM1, PAX2                                                                                                                                                                                                                                                                                                             |
| 166 | HDAC10  | ENSG00000100429  | -       |        | AP2GAMMA, COREBF, MZF1, PEAS3, AP2REP, MAZ, MAZR, OSF2, STAT5A, ZF5                                                                                                                                                                                                                                                     |
| 166 |         | ENSG00000073196  | unknown |        | AP2GAMMA, COREBF, MZF1, PEAS3, AP1, CDPCR3HD, CETS1P54, E2F1, E47, GKLF, LYF1, MYOD, NRF1, SP1                                                                                                                                                                                                                          |
| 167 |         | ENSG00000157600  | +       |        | CHOP, PAX4, TFII3, AP3, GATA4, GKLF, LFA1, MYB, P300, SMAD3, SP1, SRF                                                                                                                                                                                                                                                   |
| 167 |         |                  |         |        | CHOP, PAX4, TFII3, AP2ALPHA, AP4, BRN2, CDX2, CEBPGAMMA, EVI1, FOXM1, FOXO4, HNF1, HNF3ALPHA, LYF1, MSX1, OCT1, POU3F2, PU1, RREB1, STAT5A, TST1, ZIC3                                                                                                                                                                  |
| 167 | AMMECR1 | ENSG00000101935  | -       | 315128 | DBP, MAZ, STAT5A, ZIC3, AML1, AP1F3, CACBP, GATA2, HNF4, MZF1, PAX2, TCF1P, TFII3, TITF1                                                                                                                                                                                                                                |
| 168 | FHL1    | ENSG00000022267  | +       |        | DBP, MAZ, STAT5A, ZIC3, AREB6, CETS1P54, HMGYI, HOXA4, IRF1, NFE2, NKX25, OCT1, PAX4, POU1F1, SMAD4, SP1, SRY, STAT, STAT3, STAT6, USF2                                                                                                                                                                                 |
| 168 |         | ENSG00000129680  | -       | 103852 | AP2ALPHA, DBP, MYOGENIN, PAX4, TGIF                                                                                                                                                                                                                                                                                     |
| 169 | MTMR1   | ENSG000000063601 | +       |        | AP2ALPHA, DBP, AP1, AP2GAMMA, AP2REP, AREB6, CDC5, CEBPGAMMA, COREBF, CRX, ERR1, FOXO4, FREAC4, HSF1, MAZ, MRF2, NKX25, OCT1, PAX2, POU6F1, SRY, TCF4                                                                                                                                                                   |
| 169 | CD99L2  | ENSG00000102181  | -       | 205234 | AP2ALPHA, AP2REP, E2F1, E2F1DP1, FOXM1, MSX1                                                                                                                                                                                                                                                                            |
| 170 | ATP6AP1 | ENSG00000071553  | +       |        | PAX4                                                                                                                                                                                                                                                                                                                    |
| 170 | GD11    | ENSG00000102129  | +       | 8456   | CEBPB, ETF, TEF1, YY1, ZF5                                                                                                                                                                                                                                                                                              |
| 171 | FUNDC2  | ENSG00000165775  | +       |        | PAX4, PAX4, AP2GAMMA, AREB6, BACH1, BRN2, CDX2, CEBP, CEBPB, E2F, E2F1DP1, ELK1, EN1, EVI1, FOXO3, FOXO4, GATA1, HNF4, HMGYI, HNF3ALPHA, HNF6, IK2, IPF1, LEF1, LFA1, LYF1, MAZ, MSX1, MYOD, MZF1, NFE2, NKX62, OCT1, OSF2, PEAS3, SF1, STAT3, STAT5B, TCF11, TEF, TFII3, ZF5                                           |
| 171 |         | ENSG00000165778  | unknown |        |                                                                                                                                                                                                                                                                                                                         |
