# Supplementary material for: Chromosomal clustering of a human transcriptome reveals regulatory background
Source: PubMed Central journal article supplement (PMC1261156; doi:10.1186/1471-2105-6-230), 2005-09-19
Supplement: 1471-2105-6-230-S2.pdf [file 1471-2105-6-230-S2.pdf]

Table 2S – Gene Ontology terms shared by gene clusters

| 1st Ensembl-Gene | 2nd Ensembl-Gene | 1st Hugo-Name | 2nd Hugo-Name | Common GO-Terms in Layer 4                                                   | Common GO-Terms in Layer 5                                        |
|------------------|------------------|---------------|---------------|------------------------------------------------------------------------------|-------------------------------------------------------------------|
| ENSG00000008125  | ENSG00000008128  | MIFR-2        | CDC2L1        | GO:0019538                                                                   |                                                                   |
| ENSG00000175279  | ENSG00000160049  | CORT          | DFFA          | GO:0003677,GO:0007242                                                        |                                                                   |
| ENSG00000153898  | ENSG00000055732  | MCOLN2        | MCOLN3        | GO:0015268,GO:0006811                                                        | GO:0005216,GO:0006812                                             |
| ENSG00000162654  | ENSG00000154451  | GBP4          | GBPS          | GO:0017076,GO:0016817,GO:0009607                                             | GO:0019001,GO:0016818,GO:0006952                                  |
| ENSG00000084754  | ENSG00000138029  | HADHA         | HADHB         | GO:0016614,GO:0016746,GO:0016835,GO:0005737,GO:0006629,GO:0006082            | GO:0016616,GO:0016747,GO:0016836,GO:0005739,GO:0006631,GO:0019752 |
| ENSG00000143947  | ENSG00000085760  | RPS27A        | MTIF2         | GO:0005737,GO:0009058,GO:0019538                                             | GO:0009059,GO:0006412                                             |
| ENSG00000144021  | ENSG00000144028  | unknown       | ASCC3L1       | GO:0005634,GO:0006139                                                        |                                                                   |
| ENSG00000088179  | ENSG00000115109  | PTPN4         | EPB41L5       | GO:0005737                                                                   | GO:0005856                                                        |
| ENSG00000138443  | ENSG00000173166  | ABI2          | RAPH1         | GO:0005737                                                                   |                                                                   |
| ENSG00000173166  | ENSG00000178562  | RAPH1         | CD28          | GO:0007166                                                                   |                                                                   |
| ENSG00000178562  | ENSG00000163599  | CD28          | CTLA4         | GO:0005887,GO:0016021,GO:0009607                                             | GO:0005887,GO:0006952                                             |
| ENSG00000134086  | ENSG00000134070  | VHL           | IRAK2         | GO:0019538                                                                   |                                                                   |
| ENSG00000131368  | ENSG00000131381  | MRPS25        | ZFYVE20       | GO:0005737                                                                   |                                                                   |
| ENSG00000145284  | ENSG00000138674  | SCD4          | SEC31L1       | GO:0005737                                                                   |                                                                   |
| ENSG00000052802  | ENSG00000109472  | SC4MOL        | CPE           | GO:0005886                                                                   |                                                                   |
| ENSG00000132356  | ENSG00000145592  | PRKAA1        | RPL37         | GO:0009058,GO:0019538                                                        | GO:0009059                                                        |
| ENSG00000113318  | ENSG00000113319  | MSH3          | RASGRF2       | GO:0017076                                                                   |                                                                   |
| ENSG00000152700  | ENSG00000113615  | SARA2         | SEC24A        | GO:0005737,GO:0015031                                                        | GO:0005783,GO:0005794,GO:0006886                                  |
| ENSG00000177895  | ENSG00000177839  | PCDHB16       | PCDHB9        | GO:0016337,GO:0019226,GO:0009887,GO:0016021                                  | GO:0007156,GO:0007268,GO:0007399                                  |
| ENSG00000122566  | ENSG00000122565  | HNRPA2B1      | CBX3          | GO:0005634,GO:0006139                                                        |                                                                   |
| ENSG00000167031  | ENSG00000147454  | LYSAL1        | unknown       | GO:0005737                                                                   |                                                                   |
| ENSG00000136933  | ENSG00000044574  | unknown       | HSPA5         | GO:0005737                                                                   |                                                                   |
| ENSG00000156510  | ENSG00000156515  | unknown       | HK1           | GO:0016772,GO:0019200,GO:0017076,GO:0005975,GO:0006066,GO:0009056,GO:0006091 | GO:0016773,GO:0004396,GO:0030554,GO:0006096,GO:0015980            |
| ENSG00000079332  | ENSG00000180817  | SARA1         | PP            | GO:0016817                                                                   | GO:0016818                                                        |
| ENSG00000148732  | ENSG00000122863  | PSAP          | CHST3         | GO:0005737,GO:0016021                                                        |                                                                   |
| ENSG00000107796  | ENSG00000026103  | ACTA2         | TNFRSF6       | GO:0005737                                                                   |                                                                   |
| ENSG00000119912  | ENSG00000138160  | IDE           | KIF11         | GO:0005737                                                                   |                                                                   |
| ENSG00000110218  | ENSG00000123901  | PANX1         | GPR83         | GO:0016021                                                                   |                                                                   |
| ENSG00000111319  | ENSG00000111321  | SCNN1A        | LTBR          | GO:0016021                                                                   |                                                                   |
| ENSG00000069493  | ENSG00000110848  | unknown       | CD69          | GO:0004888,GO:0005529,GO:0005887,GO:0016021,GO:0009607,GO:0016337,GO:0007166 | GO:0005887,GO:0006952,GO:0007157                                  |
| ENSG00000087470  | ENSG00000139131  | DNM1L         | unknown       | GO:0017076                                                                   |                                                                   |
| ENSG00000102738  | ENSG00000102743  | MRPS31        | SLC25A15      | GO:0005737                                                                   | GO:0005739                                                        |
| ENSG00000068650  | ENSG00000126217  | ATP11A        | MCF2L         | GO:0017076                                                                   |                                                                   |
| ENSG00000165410  | ENSG00000092277  | CFL2          | BAZ1A         | GO:0005634,GO:0005737                                                        | GO:0005856                                                        |
| ENSG00000140990  | ENSG00000140988  | NDUFB10       | RPS2          | GO:0005737                                                                   |                                                                   |
| ENSG0000008516   | ENSG0000008517   | MMP25         | unknown       | GO:0009607                                                                   | GO:0006952                                                        |
| ENSG00000109046  | ENSG00000141068  | WSB1          | KSR           | GO:0007242                                                                   |                                                                   |
| ENSG00000108823  | ENSG00000108821  | SGCA          | COL1A1        | GO:0009887                                                                   |                                                                   |
| ENSG00000132874  | ENSG00000141469  | SLC14A2       | SLC14A1       | GO:0016021,GO:0015204,GO:0015268,GO:0015837                                  | GO:0015204,GO:0015840                                             |
| ENSG00000152229  | ENSG00000152234  | PSTPIP2       | ATP5A1        | GO:0005737                                                                   |                                                                   |
| ENSG00000130254  | ENSG00000160633  | SAFB2         | SAFB          | GO:0003677,GO:0005634                                                        |                                                                   |
| ENSG00000090659  | ENSG00000104938  | CD209         | CD209L        | GO:0005529                                                                   |                                                                   |
| ENSG00000125753  | ENSG00000125741  | VASP          | OPA3          | GO:0005737                                                                   | GO:0005856                                                        |
| ENSG00000142541  | ENSG00000142534  | RPL13A        | RPS11         | GO:0005737,GO:0030529,GO:0009058,GO:0019538                                  | GO:0005840,GO:0009059,GO:0006412                                  |
| ENSG00000123872  | ENSG00000175885  | unknown       | ZNF611        | GO:0005634,GO:0006139                                                        | GO:0006350                                                        |
| ENSG00000170954  | ENSG00000170949  | ZNF415        | ZNF160        | GO:0006139                                                                   | GO:0006350                                                        |
| ENSG00000000419  | ENSG00000124217  | DPM1          | MOC53         | GO:0009058                                                                   |                                                                   |
| ENSG00000142192  | ENSG00000166265  | APP           | CYR1          | GO:0016021                                                                   |                                                                   |
| ENSG00000159113  | ENSG00000142166  | IL10RB        | IFNAR1        | GO:0004888,GO:0019955,GO:0016021,GO:0009607                                  | GO:0004896                                                        |
| ENSG00000160216  | ENSG00000160218  | AGPAT3        | TMEM1         | GO:0016021                                                                   |                                                                   |
| ENSG00000100413  | ENSG00000172346  | POLR3H        | unknown       | GO:0006139                                                                   | GO:0006350                                                        |

| <b>GO-Term layer 4</b> | <b>Description</b>                                              | <b>GO-Term layer 5</b> | <b>Description</b>                                                                |
|------------------------|-----------------------------------------------------------------|------------------------|-----------------------------------------------------------------------------------|
| GO:0003677             | DNA binding                                                     | GO:0004396             | hexokinase activity                                                               |
| GO:0004888             | transmembrane receptor activity                                 | GO:0004896             | hematopoietin/interferon-class (D200-domain) cytokine receptor activity           |
| GO:0005529             | sugar binding                                                   | GO:0005216             | ion channel activity                                                              |
| GO:0005634             | nucleus                                                         | GO:0005739             | mitochondrion                                                                     |
| GO:0005737             | cytoplasm                                                       | GO:0005783             | endoplasmic reticulum                                                             |
| GO:0005886             | plasma membrane                                                 | GO:0005794             | Golgi apparatus                                                                   |
| GO:0005887             | integral to plasma membrane                                     | GO:0005840             | ribosome                                                                          |
| GO:0005975             | carbohydrate metabolism                                         | GO:0005856             | cytoskeleton                                                                      |
| GO:0006066             | alcohol metabolism                                              | GO:0005887             | integral to plasma membrane                                                       |
| GO:0006082             | organic acid metabolism                                         | GO:0006096             | glycolysis                                                                        |
| GO:0006091             | generation of precursor metabolites and energy                  | GO:0006350             | transcription                                                                     |
| GO:0006139             | nucleobase, nucleoside, nucleotide and nucleic acid metabolism  | GO:0006412             | protein biosynthesis                                                              |
| GO:0006629             | lipid metabolism                                                | GO:0006631             | fatty acid metabolism                                                             |
| GO:0006811             | ion transport                                                   | GO:0006812             | cation transport                                                                  |
| GO:0007166             | cell surface receptor linked signal transduction                | GO:0006886             | intracellular protein transport                                                   |
| GO:0007242             | intracellular signaling cascade                                 | GO:0006952             | defense response                                                                  |
| GO:0009056             | catabolism                                                      | GO:0007156             | homophilic cell adhesion                                                          |
| GO:0009058             | biosynthesis                                                    | GO:0007157             | heterophilic cell adhesion                                                        |
| GO:0009607             | response to biotic stimulus                                     | GO:0007268             | synaptic transmission                                                             |
| GO:0009887             | organogenesis                                                   | GO:0007399             | neurogenesis                                                                      |
| GO:0015031             | protein transport                                               | GO:0009059             | macromolecule biosynthesis                                                        |
| GO:0015204             | urea transporter activity                                       | GO:0015204             | urea transporter activity                                                         |
| GO:0015268             | alpha-type channel activity                                     | GO:0015840             | urea transport                                                                    |
| GO:0015837             | amine transport                                                 | GO:0015980             | energy derivation by oxidation of organic compounds                               |
| GO:0016021             | integral to membrane                                            | GO:0016616             | oxidoreductase activity, acting on the CH-OH group of donors, NAD or NADP as ac   |
| GO:0016337             | cell-cell adhesion                                              | GO:0016747             | transferase activity, transferring groups other than amino-acyl groups            |
| GO:0016614             | oxidoreductase activity, acting on CH-OH group of donors        | GO:0016773             | phosphotransferase activity, alcohol group as acceptor                            |
| GO:0016746             | transferase activity, transferring acyl groups                  | GO:0016818             | hydrolase activity, acting on acid anhydrides, in phosphorus-containing anhydride |
| GO:0016772             | transferase activity, transferring phosphorus-containing groups | GO:0016836             | hydro-lyase activity                                                              |
| GO:0016817             | hydrolase activity, acting on acid anhydrides                   | GO:0019001             | guanyl nucleotide binding                                                         |
| GO:0016835             | carbon-oxygen lyase activity                                    | GO:0019752             | carboxylic acid metabolism                                                        |
| GO:0017076             | purine nucleotide binding                                       | GO:0030554             | adenyl nucleotide binding                                                         |
| GO:0019200             | carbohydrate kinase activity                                    |                        |                                                                                   |
| GO:0019226             | transmission of nerve impulse                                   |                        |                                                                                   |
| GO:0019538             | protein metabolism                                              |                        |                                                                                   |
| GO:0019955             | cytokine binding                                                |                        |                                                                                   |
| GO:0030529             | ribonucleoprotein complex                                       |                        |                                                                                   |
