# Supplementary material for: Chromosomal clustering of a human transcriptome reveals regulatory background
Source: PubMed Central journal article supplement (PMC1261156; doi:10.1186/1471-2105-6-230), 2005-09-19

Figure 1S

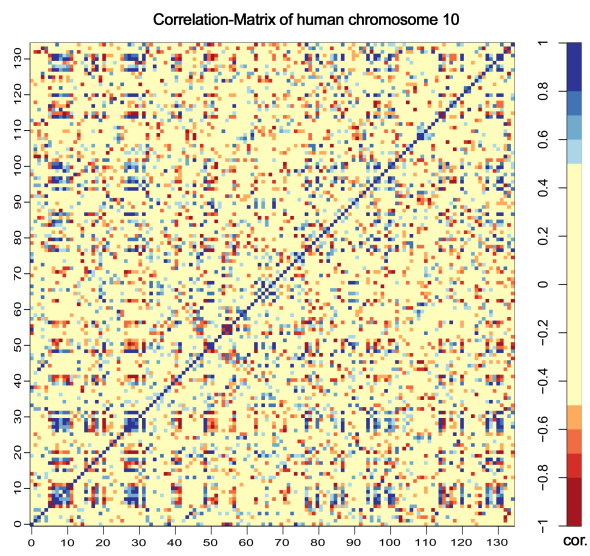

Supplement: 1471-2105-6-230-S3.pdf [file 1471-2105-6-230-S3.pdf]
